1 **Nuclear Factor Kappa B Over-Activation in the Intervertebral Disc Leads to Macrophage**  
2 **Recruitment and Severe Disc Degeneration**

3

4 **Kevin G. Burt<sup>1,2</sup>, Min Kyu M. Kim<sup>1</sup>, Dan C. Viola<sup>1</sup>, Adam C. Abraham<sup>3</sup>, Nadeen O.**  
5 **Chahine<sup>1,2\*</sup>**

6

7 <sup>1</sup>Department of Orthopedic Surgery, Columbia University, New York, NY, United States

8 <sup>2</sup>Department of Biomedical Engineering, Columbia University, New York, NY, United States

9 <sup>3</sup>Department of Orthopaedic Surgery, University of Michigan, Ann Arbor, MI, United States

10 *Correspondence to:* Nadeen O. Chahine ([noc7@columbia.edu](mailto:noc7@columbia.edu))

11

12 Supported in part by grants from the NIH R01AR069668, R01AR077760, and R21AR080516

13

14

15

16

17

18

19

20

21 **Authors' contributions:**

22 KGB, MKK, ACA, and NOC provided study design. KGB, MKK, and DCV conducted the study.

23 KGB, MKK, ACA, and NOC analyzed and/or interpreted the data. KGB, MKK, and NOC drafted

24 and edited the manuscript. All authors have read and approved the final manuscript.

25 **ABSTRACT:**

26 Objective: Low back pain (LBP) is the leading cause of global disability and is thought to be driven  
27 primarily by intervertebral disc (IVD) degeneration (DD). Persistent upregulation of catabolic  
28 enzymes and inflammatory mediators have been associated with severe cases of DD. Nuclear  
29 factor kappa B (NF- $\kappa$ B) is a master transcription regulator of immune responses and is over  
30 expressed during inflammatory-driven musculoskeletal diseases, including DD. However, its role  
31 in triggering DD is unknown. Therefore, this study investigated the effect of NF- $\kappa$ B pathway over-  
32 activation on IVD integrity and DD pathology.

33 Methods: Using skeletally mature mouse model, we genetically targeted IVD cells for canonical  
34 NF- $\kappa$ B pathway activation via expression of a constitutively active form of inhibitor of  $\kappa$ B kinase  
35 B (IKK $\beta$ ), and assessed changes in IVD cellularity, structural integrity including histology, disc  
36 height, and extracellular matrix (ECM) biochemistry, biomechanics, expression of inflammatory,  
37 catabolic, and neurotropic mediators, and changes in macrophage subsets, longitudinally up to 6-  
38 months post activation.

39 Results: Prolonged NF- $\kappa$ B activation led to severe structural degeneration, with a loss of  
40 glycosaminoglycan (GAG) content and complete loss of nucleus pulposus (NP) cellularity.  
41 Structural and compositional changes decreased IVD height and compressive mechanical  
42 properties with prolonged NF- $\kappa$ B activation. These alterations were accompanied by increases in  
43 gene expression of inflammatory molecules (*Il1b*, *Il6*, *Nos2*), chemokines (*Mcp1*, *Mif*), catabolic  
44 enzymes (*Mmp3*, *Mmp9*, *Adamts4*), and neurotrophic factors (*Bdnf*, *Ngf*) within IVD tissue.  
45 Increased recruitment of activated *F4/80*<sup>+</sup> macrophages exhibited a greater abundance of pro-  
46 inflammatory (CD38<sup>+</sup>) over inflammatory-resolving (CD206<sup>+</sup>) macrophage subsets in the IVD,  
47 with temporal changes in the relative abundance of macrophage subsets over time, providing  
48 evidence for temporal regulation of macrophage polarization in DD *in vivo*, where macrophages  
49 participate in resolving the inflammatory cascade but promote fibrotic transformation of the IVD  
50 matrix. We further show that NF- $\kappa$ B driven secretory factors from IVD cells increase macrophage  
51 migration and inflammatory activation, and that the secretome of inflammatory-resolving  
52 macrophages mitigates effects of NF- $\kappa$ B overactivation.

53 Conclusion: Overall the observed results suggest prolonged NF- $\kappa$ B activation can induce severe  
54 DD, acting through increases in inflammatory cytokines, chemotactic proteins, catabolic enzymes,

55 and the recruitment and inflammatory activation of a macrophage cell populations, that can be  
56 mitigated with inflammatory-resolving macrophage secretome.

57

58

59

## 60 **INTRODUCTION:**

61 Chronic inflammation plays a critical role across musculoskeletal tissue diseases by contributing  
62 to degeneration and pain, which have a massive global impact on disability and wellbeing. Among  
63 musculoskeletal tissue diseases, low back pain (LBP) is the leading cause of disability globally,  
64 where a growing prevalence and limited therapeutic interventions drives an annual U.S. economic  
65 encumbrance over \$100 billion (1, 2). Although the etiology of LBP is multifactorial,  
66 intervertebral disc (IVD) degeneration is the most prevalent contributor to symptomatic LBP (3).  
67 A commonly proposed signaling driver of chronic musculoskeletal inflammation is the master  
68 transcription factor nuclear factor kappa B (NF- $\kappa$ B), which is known to mediate immune responses  
69 and has been observed to be elevated locally in connective tissues of patients with disc  
70 degeneration (DD) (4), and other musculoskeletal soft tissue diseases such as tendinopathy (5),  
71 knee osteoarthritis (OA) (6), and synovial rheumatoid arthritis (RA) (7).

72

73 Molecularly, canonical NF- $\kappa$ B activation is mediated by degradation of the inhibitor of NF- $\kappa$ B  
74 (I $\kappa$ B $\alpha$ ) by the I $\kappa$ B kinase (IKK) complex, containing the regulating subunit, IKK $\gamma$ , and catalytic  
75 subunits, IKK $\alpha$  and IKK $\beta$ . I $\kappa$ B $\alpha$  degradation allows NF- $\kappa$ B to freely translocate from the  
76 cytoplasm to the nucleus to regulate transcription. During canonical pathway activation NF- $\kappa$ B  
77 subunits, most commonly p50 and p65, regulate transcription of downstream inflammatory  
78 signaling (8, 9). Within the IVD and during degeneration, inflammatory cytokines (10, 11) and

79 catabolic enzymes (12-14) have been found to be persistently elevated in human degenerated  
80 IVDs. Coinciding with persistent inflammation, increased innate immune cell presence,  
81 specifically macrophages, has been observed in DD samples and is thought to engage in  
82 inflammatory driven crosstalk with IVD cells (15-17). The master transcription factor, NF- $\kappa$ B, is  
83 known to regulate a number of these inflammatory cytokines and catabolic enzymes, as well as  
84 mediate immune cell recruitment and activation (8, 18, 19).

85  
86 Though chronic inflammation is thought to be a key driver of DD, there is a lack of *in vivo* models  
87 of inflammatory driven DD. Surprisingly, prior studies evaluating global inflammatory mutations  
88 have yielded mixed outcomes on the effects to IVD integrity (20, 21). Specifically, investigations  
89 of global overexpression of human *TNF $\alpha$*  in Tg197 mice resulted in systemic inflammation with  
90 higher incidence of spontaneous herniation, increased immune cell presence, and degenerative  
91 changes in vertebral bone, but no overt evidence of DD was observed, suggesting that human  
92 *TNF $\alpha$*  driven systemic inflammation does not produce severe DD (20). In a model of IL-1 mediated  
93 inflammation, IL-1 receptor antagonist (IL-1ra) knockout mice were found to exhibit features of  
94 DD (structural degeneration, increased catabolic enzyme expression), suggesting that deletion of  
95 the natural inhibitor of IL-1 (IL-1ra) created a global IL-1 imbalance, which could serve as a  
96 possible driver of DD (21). Yet, another study that investigated IVD integrity in IL-1 $\alpha/\beta$  knock  
97 out mice found little to no effect on IVD integrity, despite evidence of decreased systemic cytokine  
98 levels (22). Moreover, global deletion of IL-1ra had no appreciable effect on the response of IVD  
99 to puncture injury (23). Together the unexpected and disparate effects observed using global over  
100 activation or knock out models highlight the complexity of using regulation of systemic  
101 inflammatory signaling to study local effects on IVD integrity, in part because the IVD naturally

102 exists in an avascular niche, which may limit the impact of systemic inflammation on the IVD.  
103 Therefore, there remains a gap in knowledge on whether persistent local IVD inflammation can  
104 produce severe DD *in vivo*.

105

106 To directly investigate the role of discal inflammation in the development of DD we utilized an  
107 inducible cartilage specific genetic mouse model to target constitutive activation of NF- $\kappa$ B in all  
108 compartments of the IVD, assessing for tissue structural, compositional, and biological changes.  
109 We hypothesized that prolonged canonical NF- $\kappa$ B pathway activation within IVD cells will induce  
110 a chronic pro-inflammatory microenvironment that mimics inflammatory features of clinical DD,  
111 which in turn will activate an innate immune response and produce advanced morphological DD  
112 in otherwise healthy adult mice. Findings indicate that inducing persistent inflammation in the  
113 IVD is sufficient to cause severe DD mediated by increased pro-inflammatory cytokine,  
114 chemokine, and catabolic enzyme expression and macrophage recruitment. Furthermore, we  
115 demonstrate the secretome of IVD cells over-expressing IKK $\beta$  directly promote an inflammatory  
116 macrophage phenotype, and that this modulation could be mitigated by paracrine factors derived  
117 from inflammatory-resolving macrophages.

118

119 **RESULTS:**

120 ***Development and validation of sustained IKK $\beta$ -NF- $\kappa$ B over-activation within the IVD.***

121 We used a mouse carrying the inducible Cre recombinase construct, CreERT2, in the aggrecan  
122 (*Acan*) gene to target signaling specifically in IVD *Acan*<sup>+</sup> cells. To validate the presence of Cre-  
123 mediated genetic recombination within the adult IVD, a *Acan*<sup>CreERT2</sup> mouse was crossed with a  
124 *Ail4* fluorescent reporter mouse (*Acan*Cre;*Ail4*) and IVDs were evaluated following IP tamoxifen  
125 injections. Red fluorescent protein (RFP) expression indicative of Cre-activity was detected  
126 throughout all tissue compartments of the caudal IVD (nucleus pulposus (NP), annulus fibrosus

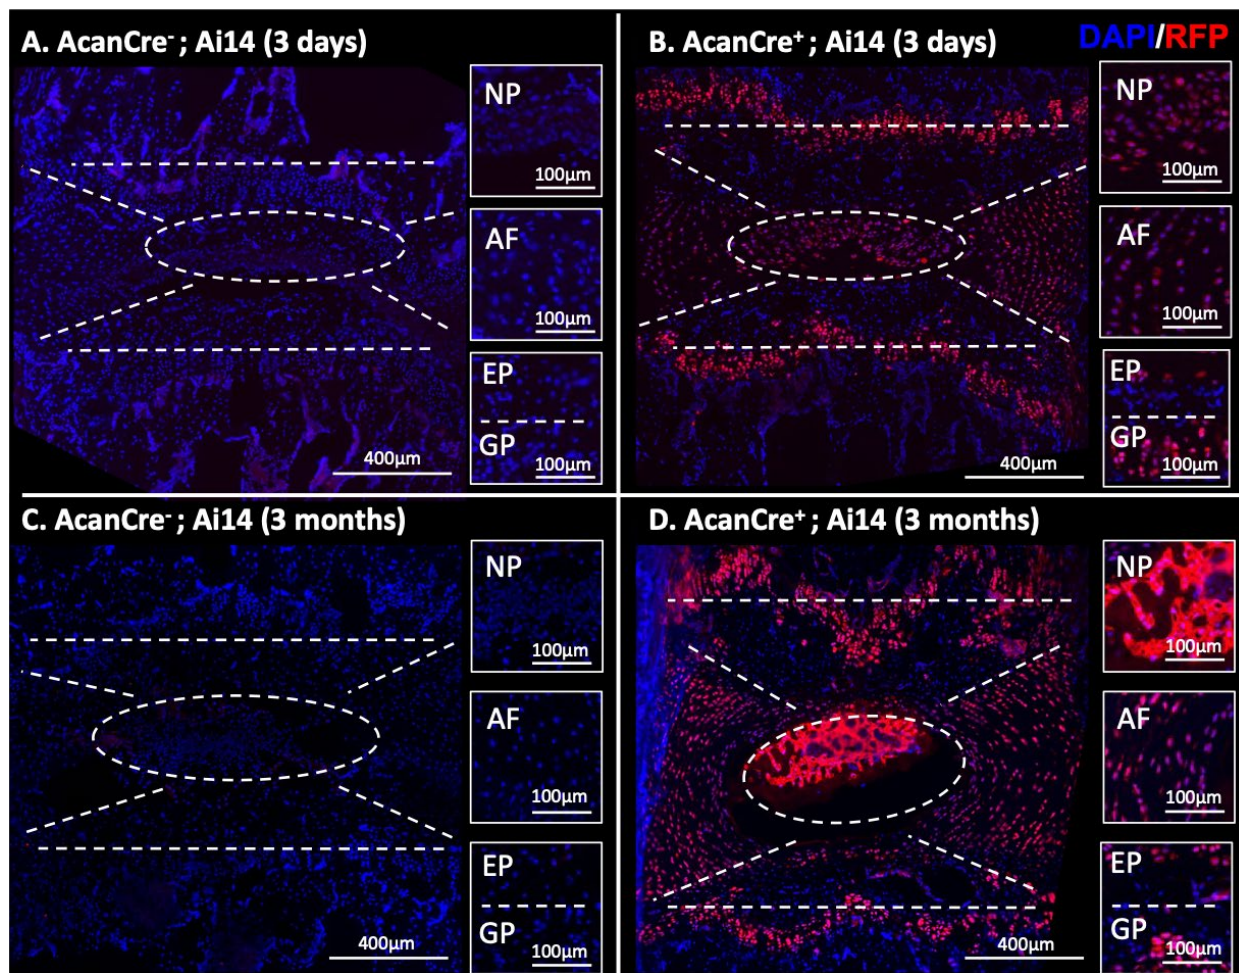

**Figure 1: The *Acan*<sup>CreERT2</sup> mouse targets all compartments of the IVD and GP.** Representative images of IF staining for RFP within mid sagittal sections of (A,C) *Acan*Cre<sup>-</sup>; *Ail4* and (B,D) *Acan*Cre<sup>+</sup>; *Ail4* reporter mice 3-days and 3-months following tamoxifen IP injections. NP, AF, EP, GP compartments are delineated (white dashed lines).

127 (AF), cartilage endplate (EP)) and in the vertebral growth plates (GP) at 3-days (Fig. 1B) and 3-  
 128 months (Fig. 1D) following IP tamoxifen injections (or post recombination). No RFP expression  
 129 was observed in the *Acan*<sup>Cre<sup>-/-</sup></sup> mice (Fig. 1A,C). Following successful validation that *Acan*<sup>Cre<sup>ERT2</sup></sup>  
 130 mice target IVD tissues for genetic recombination, we next crossed *Acan*<sup>Cre<sup>ERT2</sup></sup> mice with *Ikk2ca*<sup>fl/fl</sup>  
 131 mice to induce IKK $\beta$ -NF- $\kappa$ B over-activation in *Acan*<sup>+</sup> IVD cells upon tamoxifen IP injection  
 132 (*Acan*<sup>Cre<sup>ERT2/+</sup></sup>; *Ikk2ca*<sup>fl/fl</sup>, referred to from here on as IKK $\beta$ CA mice). IKK $\beta$  expression was  
 133 assessed in IKK $\beta$ CA mice compared to the control mice (*Acan*<sup>+/+</sup>; *Ikk2ca*<sup>fl/fl</sup>) at 1-month post  
 134 recombination. Staining for cells positive for IKK $\beta$  were detected in all IVD tissue types (NP, AF  
 135 and EP) from IKK $\beta$ CA mice (Fig. 2A), in a pattern similar to the Cre activity observed in reporter  
 136 mice. No detectable staining for IKK $\beta$  was seen in control IVDs (Fig. 2A). Moreover, significantly  
 137 increased *Ikk2* gene expression was detected in the IVDs of IKK $\beta$ CA mice shortly following

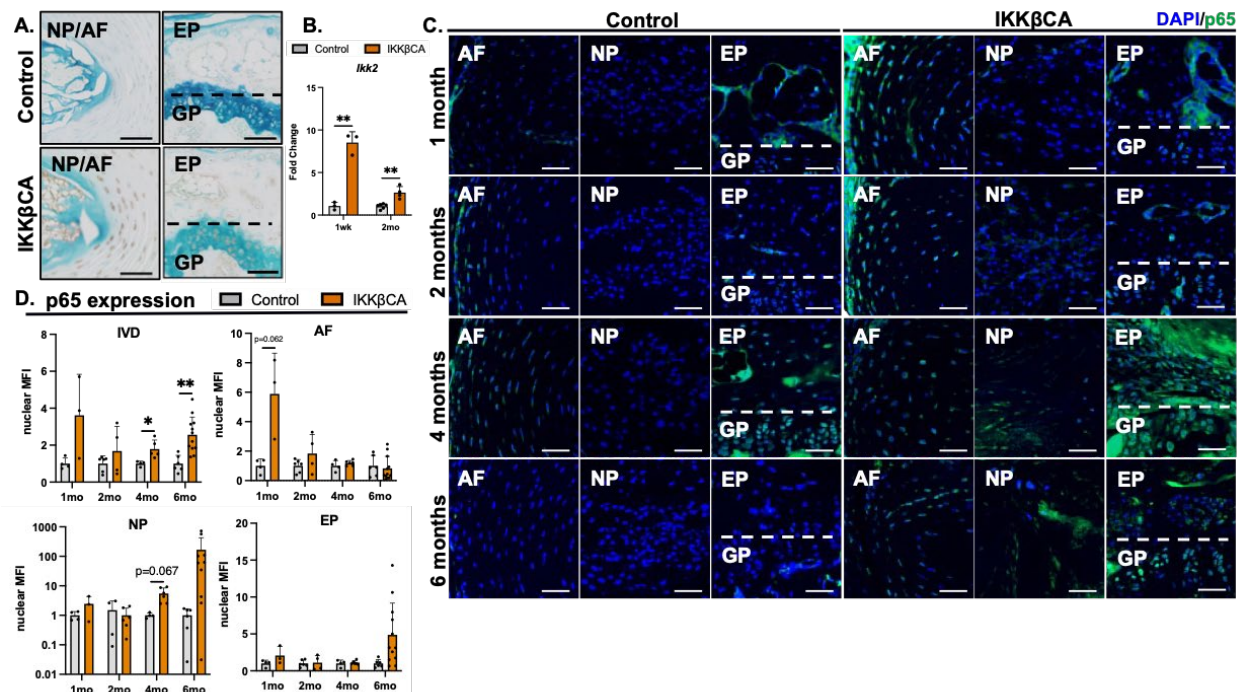

**Figure 2: IKK $\beta$  over-expression and NF- $\kappa$ B activation within IKK $\beta$ CA mice. (A)** Representative images of IHC staining for IKK $\beta$  within mid sagittal sections of 1-month control and IKK $\beta$ CA discs. Scale bar = 100 $\mu$ m. **(B)** Gene expression of *Ikk2* within IVDs expressed as fold change relative to control. **(C)** Representative IF staining for phosphorylated p65 (green) within mid sagittal sections of control and IKK $\beta$ CA discs. Scale bar = 50 $\mu$ m. **(D)** Nuclear MFI quantification (normalized to control within time point) of phosphorylated p65. \* $p < 0.05$ , \*\* $p < 0.01$ .

138 recombination, at 1-week ( $p=0.0014$ ), with sustained increase in *Ikk2* gene expression at 2-months  
139 ( $p=0.0014$ ) post recombination (Fig. 2B). Similar results in Cre-activity and increases in IKK $\beta$   
140 protein and gene (*Ikk2*) expression were also observed within lumbar IVDs (Fig. S1). Validation  
141 results showed this *in vivo* model effectively targets all IVD tissue compartments producing an  
142 increased and sustained IKK $\beta$  expression at both gene and protein levels.

143  
144 We then assessed activation of p65 subunit in the canonical IKK $\beta$ -NF- $\kappa$ B pathway, with staining  
145 for phosphorylated p65 (phospho-p65) (8). Increased immunofluorescence staining of phospho-  
146 p65 was detected in all three IVD tissues of IKK $\beta$ CA mice compared to control mice at 4-  
147 ( $p=0.048$ ) and 6-months ( $p=0.0073$ ) post activation (Fig. 2C,D). Analysis of p65 activation within  
148 tissue compartments revealed a trending increases in phospho-p65 nuclear MFI in the AF at 1-  
149 month ( $p=0.062$ ) and in the NP at 4-months ( $p=0.067$ ) post recombination in IKK $\beta$ CA mice  
150 compared to control mice (Fig. 2C,D). These results demonstrate that this model produces  
151 expression of constitutively active IKK $\beta$  within the IVD, resulting in increased and prolonged  
152 activation of downstream canonical NF- $\kappa$ B signaling pathway activation.

153  
154 ***IKK $\beta$  over-expression differentially regulates IVD inflammatory cytokine, chemokine, catabolic***  
155 ***enzyme, and neurotrophic factor gene expression over time.***

156 NF- $\kappa$ B mediates inflammatory responses via an upregulation in inflammatory cytokine,  
157 chemokine, and catabolic enzyme expression (8, 18, 19). To assess this type of activation in  
158 IKK $\beta$ CA IVDs, gene expression was assessed from RNA isolated from whole caudal IVD tissue,  
159 containing the AF, NP, and EPs. To assess for early activation of NF- $\kappa$ B, IVD tissue was harvested  
160 at 1-week post recombination, while sustained activation of NF- $\kappa$ B was assessed in IVD tissues

161



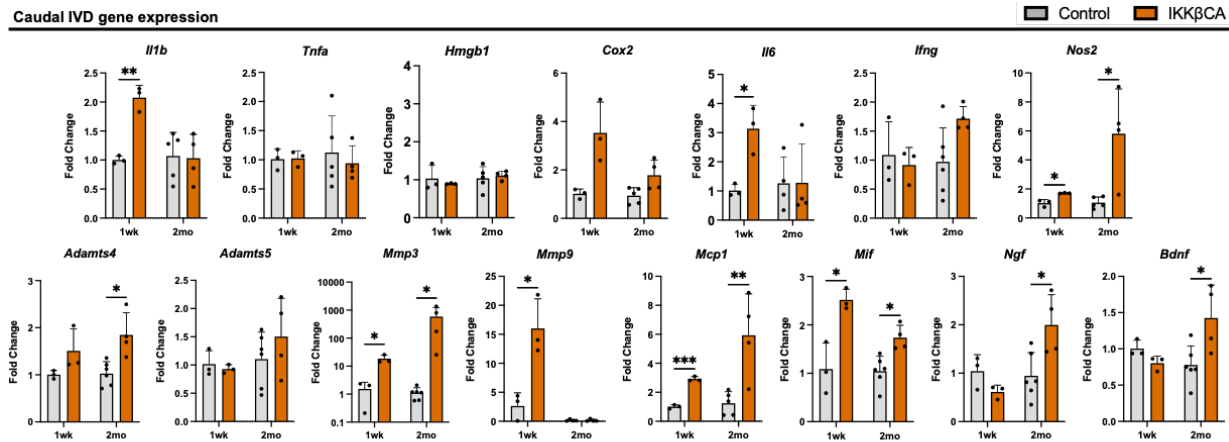

**Figure 3: IKK $\beta$  over-expression upregulates inflammatory cytokine, chemokine, catabolic enzyme, and neurotrophic factor gene expression.** Gene expression changes (relative to control) from total RNA isolated from control and IKK $\beta$ CA whole IVDs containing NP, AF, and EP, 1-week and 2-months post recombination. \* $p$ <0.05, \*\* $p$ <0.01, \*\*\* $p$ <0.001.

162

163 harvested 2-months post recombination. At 1-week post recombination, gene expression of the

164 inflammatory mediators, *Il1b* ( $p=0.0024$ ), *Il6* ( $p=0.023$ ), and *Nos2* ( $p=0.015$ ) were increased in

165 IKK $\beta$ CA IVDs compared to control (Fig. 3). Significant increases in catabolic enzymes, *Mmp3*

166 ( $p=0.021$ ) and *Mmp9* ( $p=0.028$ ), and pro-inflammatory chemokines, *Mcp1* ( $p=0.00018$ ) and *Mif*

167 ( $p=0.013$ ), were also observed in IKK $\beta$ CA mice compared to control 1-week post recombination

168 (Fig. 3). Extending this analysis of gene expression changes to 2-months post recombination, *Nos2*

169 remained significantly increased in IKK $\beta$ CA IVDs compared to control (Fig. 3). Further, at 2-

170 months post recombination the catabolic enzymes, *Adamts4* ( $p=0.014$ ) and *Mmp3* ( $p=0.041$ ), and

171 pro-inflammatory chemokines, *Mcp1* ( $p=0.0092$ ) and *Mif* ( $p=0.011$ ), were upregulated in IKK $\beta$ CA

172 mice compared to control (Fig. 3). In addition neurotrophic factors implicated in pathological

173 nerve ingrowth in DD, *Ngf* ( $p=0.033$ ) and *Bdnf* ( $p=0.040$ ), were upregulated in IKK $\beta$ CA IVDs

174 compared to control at 2-months post recombination (Fig. 3). Together gene expression results

175 suggest NF- $\kappa$ B over-activation contributed early and lasting pro-degenerative molecular changes

176 which included an upregulation of pro-inflammatory markers, chemokines and immune cell  
177 activation mediators, catabolic enzymes, and neurotrophic factors within IVD cells.

178

179 ***NF- $\kappa$ B over-activation in IVD cells produces severe morphological IVD degeneration and***  
180 ***disrupts functional mechanical properties.***

181 The IVD is a composite fibro-cartilaginous connective tissue structure consisting of distinct tissue  
182 types: the AF is a highly fibrous outer ring which encompasses a gelatinous proteoglycan rich NP,  
183 and the cartilage endplates (EPs) anchor the IVD to the adjacent vertebrae. To determine the effect  
184 of NF- $\kappa$ B mediated inflammation on IVD integrity, caudal IVD motion segments were assessed  
185 for degenerative histomorphological changes (24). At 1- and 2-months post recombination, mild  
186 degenerative changes within the NP (reduced cellularity and increased cell clustering) and AF (loss  
187 in concentric lamellae structure and cellularity) could be seen in IKK $\beta$ CA mice but not control  
188 IVDs (Fig. 4A). However, these mild observable differences did not produce statistically  
189 significant changes in histological grading scores between groups at 1- or 2-months (Fig. 4A).  
190 Interestingly, IKK $\beta$ CA mice at 4- and 6-months post recombination showed histological  
191 characteristics of severe DD. Compared to control mice, IKK $\beta$ CA mice showed decreased  
192 cellularity, loss of Safranin-O staining, loss of NP tissue structure and disruption of the border that  
193 differentiates the NP from the AF regions (i.e. NP-AF border) (Fig. 4A). AF tissue integrity was  
194 also altered, including the presence of rounded cells near the NP-AF border and inner half of the  
195 AF, loss of cellularity in the inner half of AF, and loss of lamellae structure or widened lamellae  
196 (Fig. 4A).

197

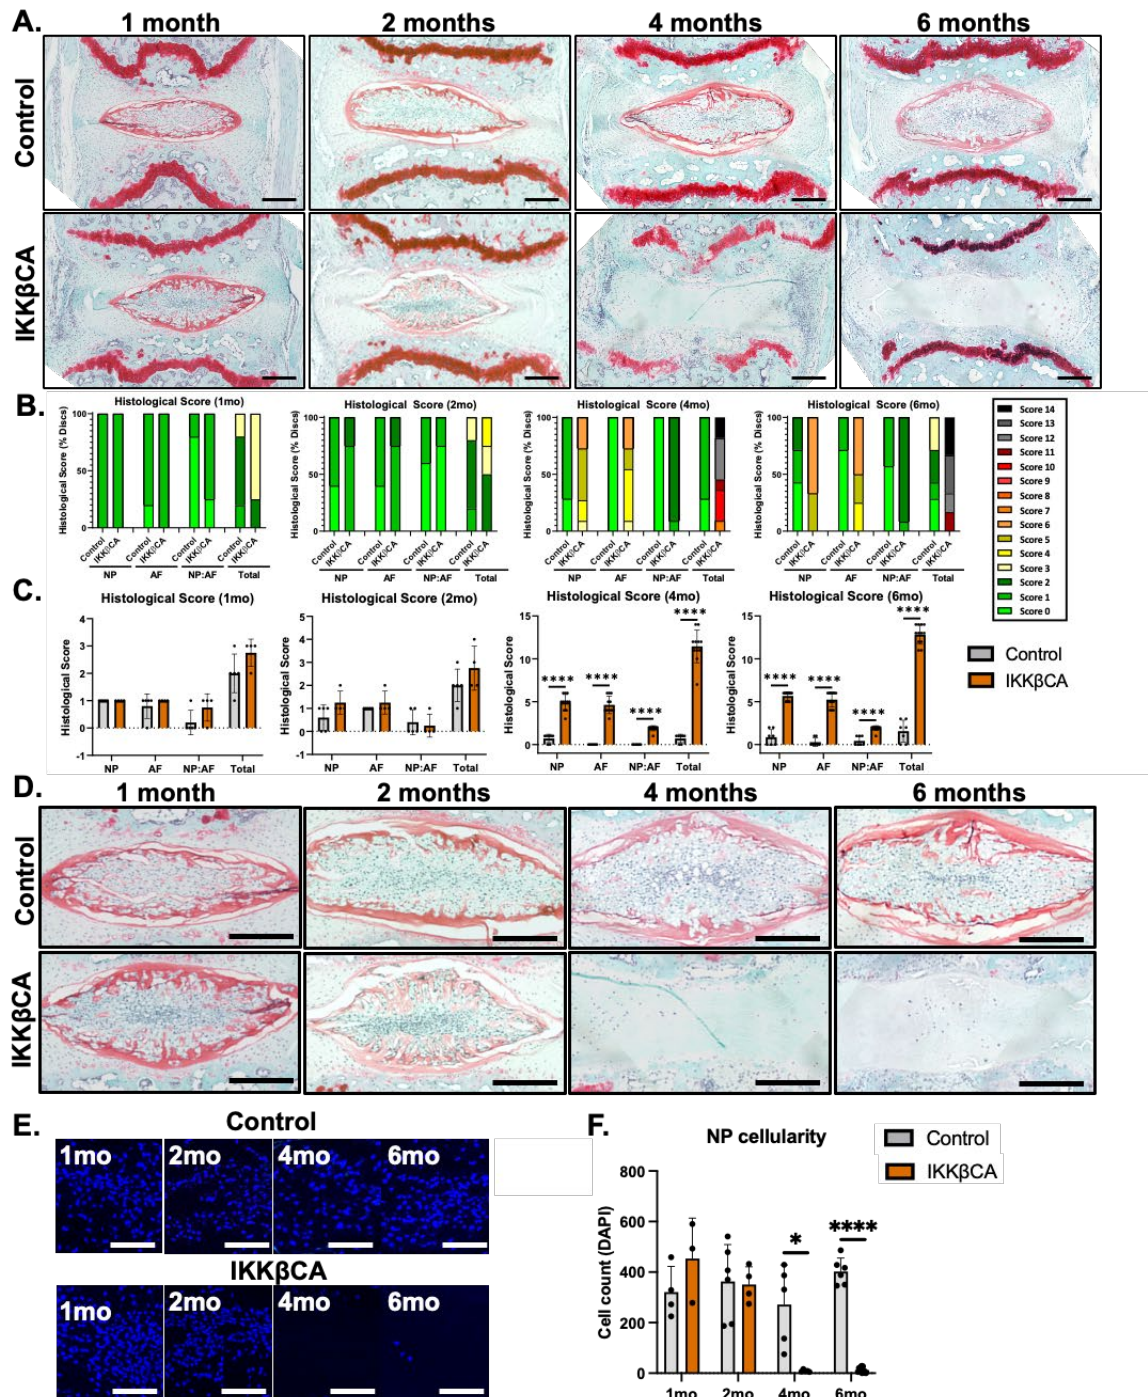

**Figure 4: IKK $\beta$  over-expression produces severe DD.** (A) Representative images of safranin-O stained mid sagittal sections of control and IKK $\beta$ CA IVDs 1-, 2-, 4-, and 6-months post recombination. Scale bar = 250 $\mu$ m. Histological scoring legend, ranging from 0 (healthy) to 14 (most severe). (B) Distribution of histological scores. (C) Histological scoring within NP, AF, and NP:AF border compartments, and total score. (D) Representative images of safranin-O stained mid sagittal sections of control and IKK $\beta$ CA IVDs at 1-, 2-, 4-, and 6-months post recombination. Scale bar = 250 $\mu$ m. (E) Representative images of DAPI (nuclear) stained mid sagittal sections. Scale bar = 100 $\mu$ m. (F) Quantification of NP cellularity within hand drawn ROIs of DAPI nuclear stained mid sagittal sections. \* $p$ <0.05, \*\*\*\* $p$ <0.0001.

198 Degenerative changes were not detected in IVDs of control mice. This led to significant increases  
199 in histological scores in IKK $\beta$ CA mice across all scoring criteria at 4- (p<0.0001) and 6-months  
200 (p<0.0001) post recombination compared to control (Fig. 4B,C).

201  
202 Among the defined histomorphological characteristics of degenerative IVD, a striking change  
203 following prolonged NF- $\kappa$ B pathway activation was the loss of NP cellularity compared to IVDs  
204 of control mice (Fig. 4D). While no significant changes in NP cell count were detected between  
205 IKK $\beta$ CA and control mice at 1- and 2-months, significant decrease in NP cell count was detected  
206 in IKK $\beta$ CA mice at 4- (p=0.018) and 6-months post recombination (p<0.0001) compared to  
207 control mice (Fig. 4E,F).

208  
209 Degenerative EP changes in cellularity, hyaline cartilage organization, clefts and micro fractures,  
210 bony sclerosis and tissue defects were also evaluated based on an EP specific grading criteria (25)  
211 that was not part of the IVD histologic scoring criteria used for evaluating the NP and AF.  
212 Degeneration within the EP were observed in IKK $\beta$ CA IVDs at 4- and 6-months post  
213 recombination, including clear cartilage and cellular disorganization (Fig. 4A). Furthermore,  
214 potential infiltrating cell populations were detected within the EP of IKK $\beta$ CA IVDs at 4- and 6-  
215 months, as indicated by nuclear stain, which was not observed in control IVDs (Fig. 4A). Lastly,  
216 degeneration within the adjacent GPs of IKK $\beta$ CA IVDs was also observed at 4- and 6-months and  
217 included GP erosion and discontinuity (Fig. 4A). These results suggest that all tissue compartments  
218 of the IVD and the closely associated GP are severely affected by prolonged NF- $\kappa$ B activation.

219

220 To determine if the observed degeneration was associated with ECM changes, specific histological  
221 staining was used to evaluate changes in GAGs (Alcian blue) and collagen (Picrosirius red)  
222 content. Compared to control mice, a mild decrease in GAG staining intensity was observed in the  
223 inner AF of IKK $\beta$ CA mice at 2-months, while a more notable loss was observed throughout the  
224 IVD of IKK $\beta$ CA mice at 4-months post recombination (Fig. 5A). However, at 6-months post  
225 recombination IKK $\beta$ CA mice exhibited an NP that lacked the notochordal cell pattern and was  
226 replaced by an acellular disorganized matrix that stained positively for GAGs (Fig 5A). In the AF,  
227 an increase in GAG staining in the pericellular matrix of large, rounded AF cells was observed in  
228 6-month IKK $\beta$ CA IVDs (Fig. 5A). Evaluation of collagen staining revealed no major differences  
229 between IKK $\beta$ CA and control IVDs at 2-months post recombination (Fig. 5B). Whereas at 4- and  
230 6-months post recombination, more pronounced collagen staining was detected within the NP and  
231 irregular lamellar AF structures of IKK $\beta$ CA IVDs compared to control IVDs (Fig. 5B). The  
232 differences in GAG and collagen staining suggest prolonged activation of NF- $\kappa$ B contributes to  
233 ECM remodeling and displacement of AF tissue into the NP region, which transitioned into a  
234 fibrotic-like NP structure. Overall, histological assessment demonstrated that IVD IKK $\beta$ -NF- $\kappa$ B  
235 over-activation leads to severe DD, consistent with features of human DD.

236

237 Having observed structural and compositional changes, changes in ECM biochemistry, functional  
238 biomechanics, and IVD height with prolonged inflammation were evaluated at time points prior  
239 to (2-months post recombination) and during the onset of morphological degeneration (3-months

240

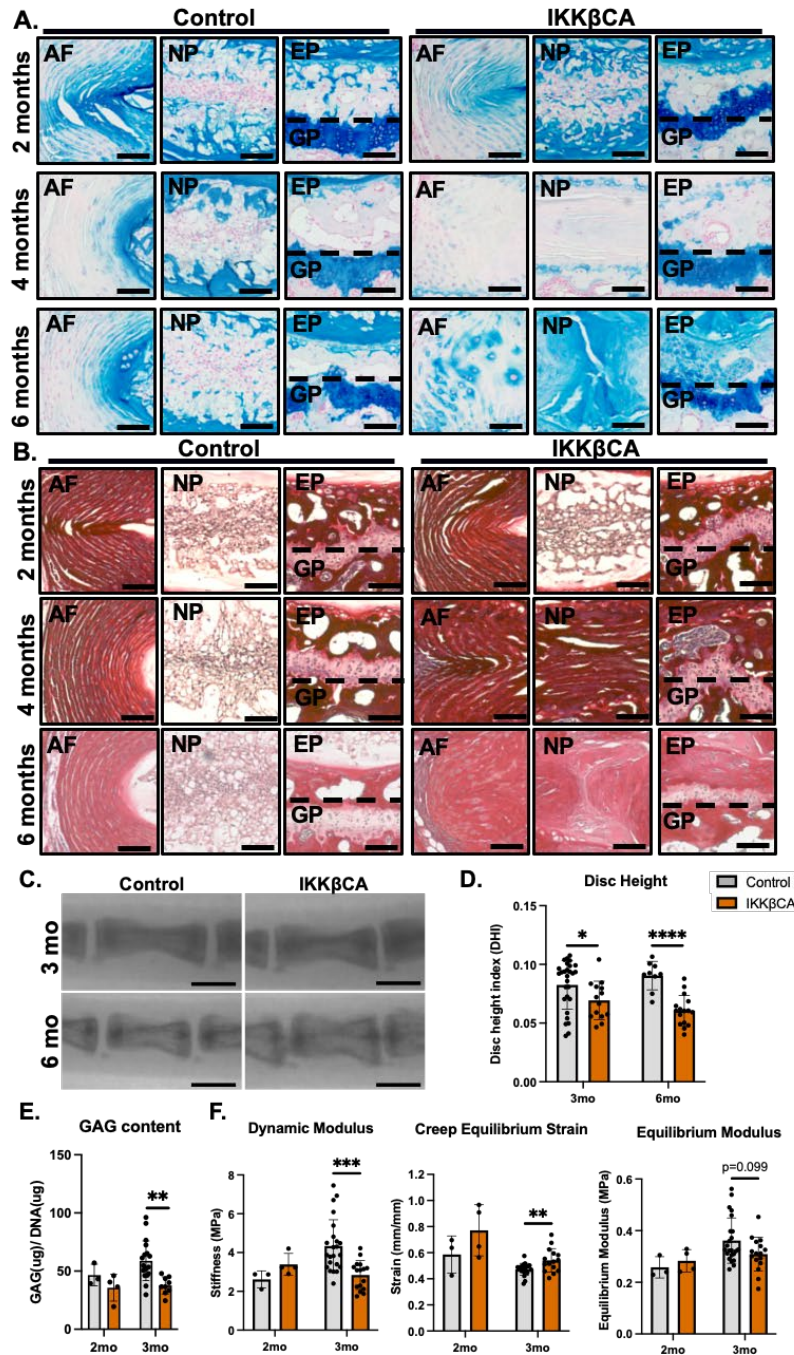

**Figure 5: IKK $\beta$  over-expression mediates a loss of ECM, disc height, and weakened mechanical properties.** (A) Representative Alcian blue (GAG) and (B) Picrosirius red (collagen) stained images of control and IKK $\beta$ CA IVDs mid sagittal sections at 2-, 4-, and 6-months post recombination. Scale bar = 100 $\mu$ m. (C) Representative fluoroscopic images of control and IKK $\beta$ CA C6-C8 IVDs 3- and 6-months post recombination. Scale bar = 1mm. (D) IVD height quantified via DHI of control and IKK $\beta$ CA discs 3- and 6-months post recombination. (E) GAG content ( $\mu$ g) normalized to total DNA content ( $\mu$ g) within control and IKK $\beta$ CA IVD digests 2- and 3-months post recombination. (F) Dynamic modulus (MPa), creep equilibrium strain (mm/mm) and equilibrium modulus (MPa) of control and IKK $\beta$ CA discs 2- and 3-months post recombination. \* $p$ <0.05, \*\* $p$ <0.01, \*\*\* $p$ <0.001, \*\*\*\* $p$ <0.0001.

241 post recombination). For this, whole IVDs were digested for a quantification of GAG content  
242 (normalized to total DNA content). The GAG content was found to be similar in IKK $\beta$ CA and  
243 control IVDs (Fig. 5E) at 2-months, consistent with the mild degenerative structural changes  
244 observed. However, at the 3-month time point, a significant loss in GAG content was observed in  
245 IKK $\beta$ CA IVDs compared to control ( $p=0.0033$ , Fig. 5E). Quantification of GAG loss within  
246 IKK $\beta$ CA IVDs is consistent with differences in GAG staining, and further demonstrates that  
247 localized NF- $\kappa$ B over-activation mediates ECM degradation within the IVD.

248 Furthering the functional evaluation, unconfined compression testing was performed using two  
249 impermeable platens, where dynamic modulus (MPa), equilibrium strain (mm/mm) and  
250 equilibrium modulus (MPa) were calculated during 20 cycles of dynamic loading to 0.25N (1x  
251 body weight) followed by an applied static load of 0.25N. The dynamic modulus of IKK $\beta$ CA IVDs  
252 at 3-months post recombination was lower than that of control ( $p=0.00058$ , Fig. 5F). Creep testing  
253 revealed an increase in creep equilibrium strain in 3-months post recombination IKK $\beta$ CA IVDs  
254 compared to control ( $p=0.0097$ , Fig. 5F). This was associated with a trend change in the  
255 equilibrium modulus within IKK $\beta$ CA IVDs compared to control ( $p=0.099$ ) (Fig. 5F). Prior to  
256 structural changes, at 2-months post recombination, mechanical testing revealed no significant  
257 differences in dynamic modulus, creep equilibrium strain, or equilibrium modulus between groups  
258 (Fig. 5F). Ultimately, changes in compressive properties of IKK $\beta$ CA IVDs revealed a loss of  
259 dynamic compression functionality and resistance to compressive loading.

260

261 In another functional output, fluoroscopy imaging was utilized to assess changes in the disc height  
262 index (DHI), commonly used as a clinical indicator of DD (26). DHI analysis of caudal spines  
263 from IKK $\beta$ CA and control mice showed discernable qualitative decreases in IVD height between

264 caudal vertebrae of IKK $\beta$ CA mice compared to control mice (Fig. 5C). Quantitative analysis  
265 revealed a significant decrease in caudal DHI in IKK $\beta$ CA mice compared to control mice at 3-  
266 (p=0.044) and 6-months (p<0.0001) post recombination (Fig. 5D). The loss of IVD height in  
267 IKK $\beta$ CA caudal spine reveals another functional consequence of prolonged NF- $\kappa$ B activation  
268 possibly associated with the loss of GAG content.

269

270 ***NF- $\kappa$ B over-activation in IVD cells promotes macrophage recruitment and activation.***

271 In addition to IVD tissue degeneration, H&E staining revealed increased cellularity in the outer  
272 AF regions of IKK $\beta$ CA mice at all time points (Fig. 4A, S2). In quantitative analysis of cell nuclei  
273 in the outer AF regions, compared to control mice, IVDs from IKK $\beta$ CA mice had significantly  
274 increased cellularity at 1- (p=0.028), 2- (p=0.00020), 4- (p=0.028), and 6-months (p=0.046) post  
275 recombination (Fig. S2). To further investigate the identity of these cell populations, we performed  
276 immunostaining for the pan-macrophage marker F4/80. Additional phenotyping of these cells  
277 using CD38 as a marker of pro-inflammatory (M1) macrophages and CD206 as a marker of the  
278 inflammatory-resolving (M2) macrophage were performed. Increased expression level of F4/80<sup>+</sup>  
279 cells was observed within IKK $\beta$ CA AF compartments across all time points (1-, 4-, and 6-months  
280 post recombination, p<0.0001), and within IKK $\beta$ CA EP compartments at 4- and 6-months  
281 (p<0.0001) post recombination when compared to control IVDs (Fig. 6A,B). Cells expressing the  
282 M1 marker, CD38, increased within IKK $\beta$ CA AF compartments at 1- (p=0.0013), 4- (p<0.0001),  
283 and 6-months (p=0.0029) post recombination, and within IKK $\beta$ CA EP compartments at 4-  
284 (p<0.0001) and 6-months (p<0.0001) post recombination when compared to control IVDs (Fig.  
285 6A,B).



286

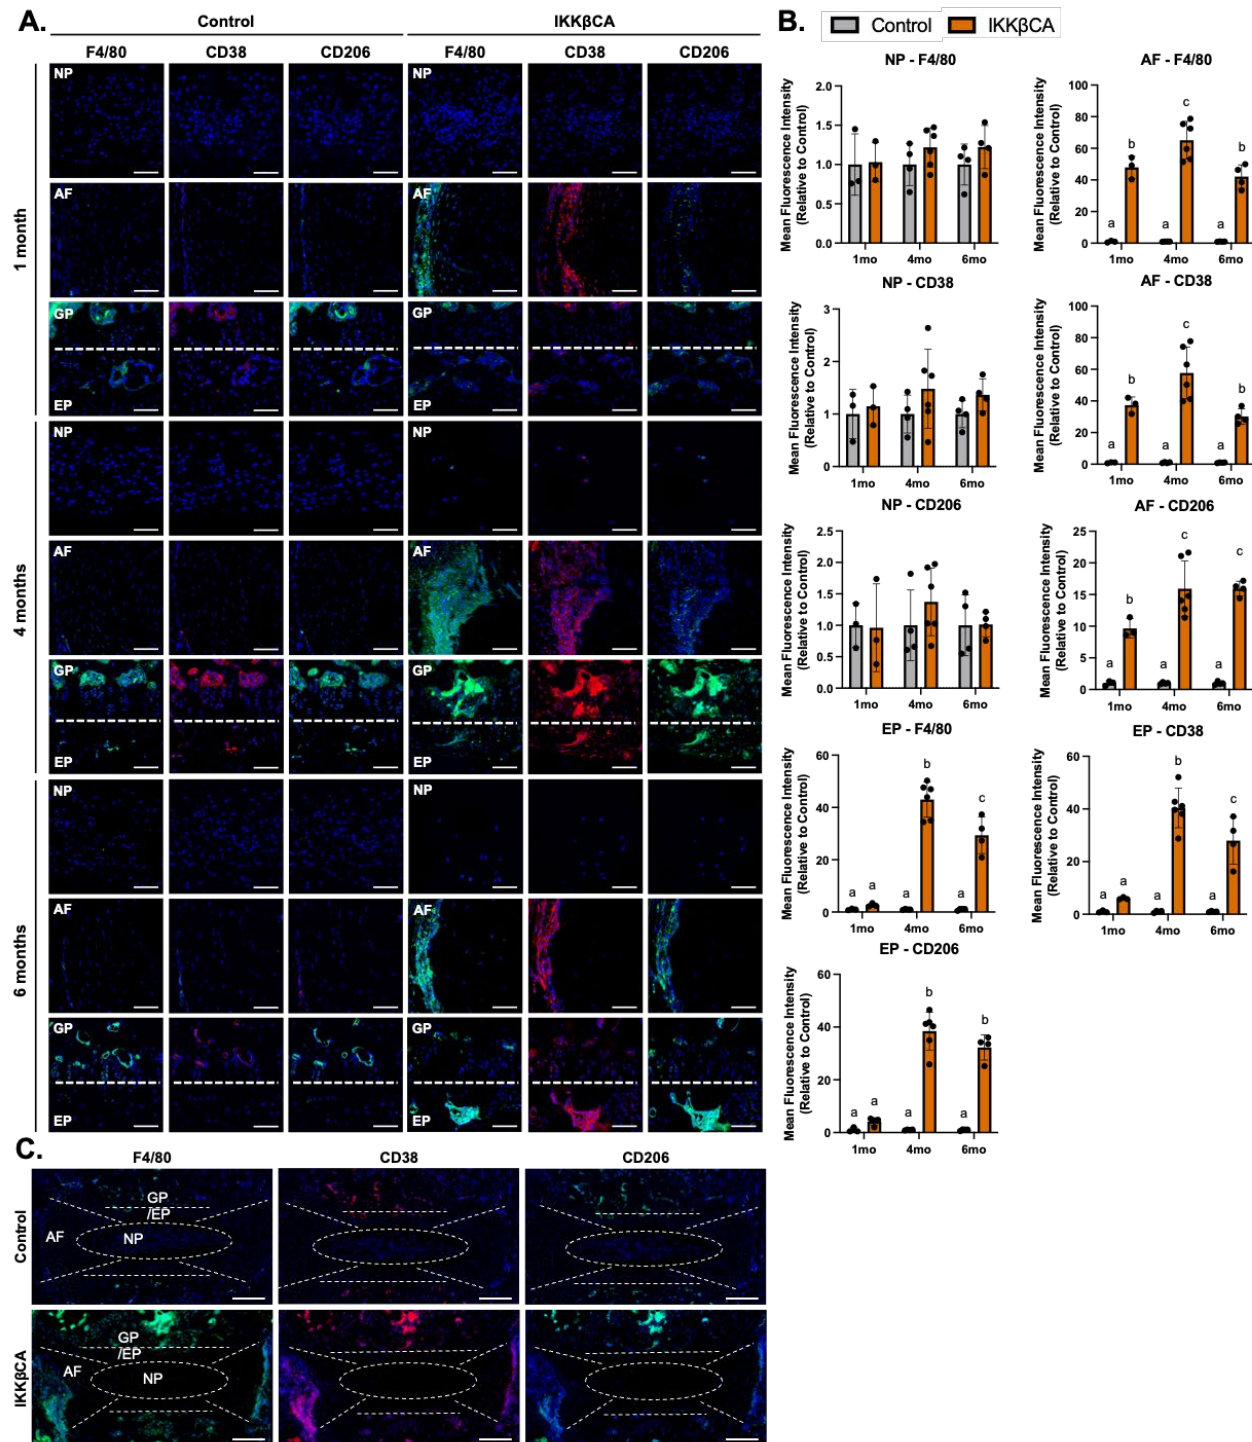

**Figure 6: IKK $\beta$  over-expression increases macrophage presence within the IVD.** (A) Representative images of IF staining for F4/80, CD38, and CD206 in mid sagittal sections of control and IKK $\beta$ CA discs 1-, 4-, and 6-months post recombination. Scale bar = 100 $\mu$ m. (B) MFI quantification of F4/80, CD38, and CD206 expression within individual NP, AF, and EP compartments. Letters (a,b,c) indicating statistically significant ( $p < 0.05$ ) different groupings. (C) Representative images of whole disc sagittal sections of control and IKK $\beta$ CA discs 4-months post recombination with delineation of tissue compartments. Scale bar = 200 $\mu$ m.

287 Expression of both F4/80<sup>+</sup> and CD38<sup>+</sup> cells peaked within AF and EP compartments of IKK $\beta$ CA  
288 IVDs at 4-months before slightly but significantly decreasing at 6-months post recombination (Fig.  
289 6A,B). Expression of CD206<sup>+</sup> cells also significantly increased in IKK $\beta$ CA IVDs over time,  
290 however the temporal pattern of expression of CD206<sup>+</sup> cells differed from CD38<sup>+</sup> cells. CD206<sup>+</sup>  
291 cells significantly increased in IKK $\beta$ CA AF compartments at 1- (p=0.0039), 4- (p<0.0001), 6-  
292 months (p<0.0001) post recombination and within IKK $\beta$ CA EP compartments at 4- (p<0.0001)  
293 and 6-months (p<0.0001) post recombination when compared to control IVDs (Fig. 6A,B). No  
294 significant differences in any macrophage marker expression was observed within the NP  
295 compartments between IKK $\beta$ CA and control IVDs (Fig. 6A,B). These results suggest NF- $\kappa$ B  
296 overactivation within IVD cells, and the associated molecular changes, initiate an immune  
297 response by recruiting and maintaining a population of macrophages within the AF and EP regions  
298 of the IVD. The IKK $\beta$ CA microenvironment promoted a greater abundance of pro-inflammatory  
299 (CD38<sup>+</sup>) over inflammatory-resolving (CD206<sup>+</sup>) macrophage subsets in the IVD, based on  
300 immunofluorescence imaging, suggesting that the IKK $\beta$ CA IVD promoted a more pro-  
301 inflammatory microenvironment.

302

303 *The pro-inflammatory effects of IVD cell secretome are mitigated by the secretome of*  
304 *inflammatory-resolving macrophages.*

305 To identify possible mechanisms responsible for the recruitment and polarization of inflammatory  
306 macrophages, we analyzed the secretome released by IKK $\beta$ CA IVD cells following recombination  
307 using whole IVD organ culture (Fig. 7A). Conditioned media (CM) from IKK $\beta$ CA IVD organ  
308 cultures had significantly greater levels of inflammatory cytokines, IL-1 $\beta$ , IL-6, and IFN- $\gamma$  and the  
309 chemokine, MCP-1, compared to CM from control IVDs (Fig. 7A,B).

310

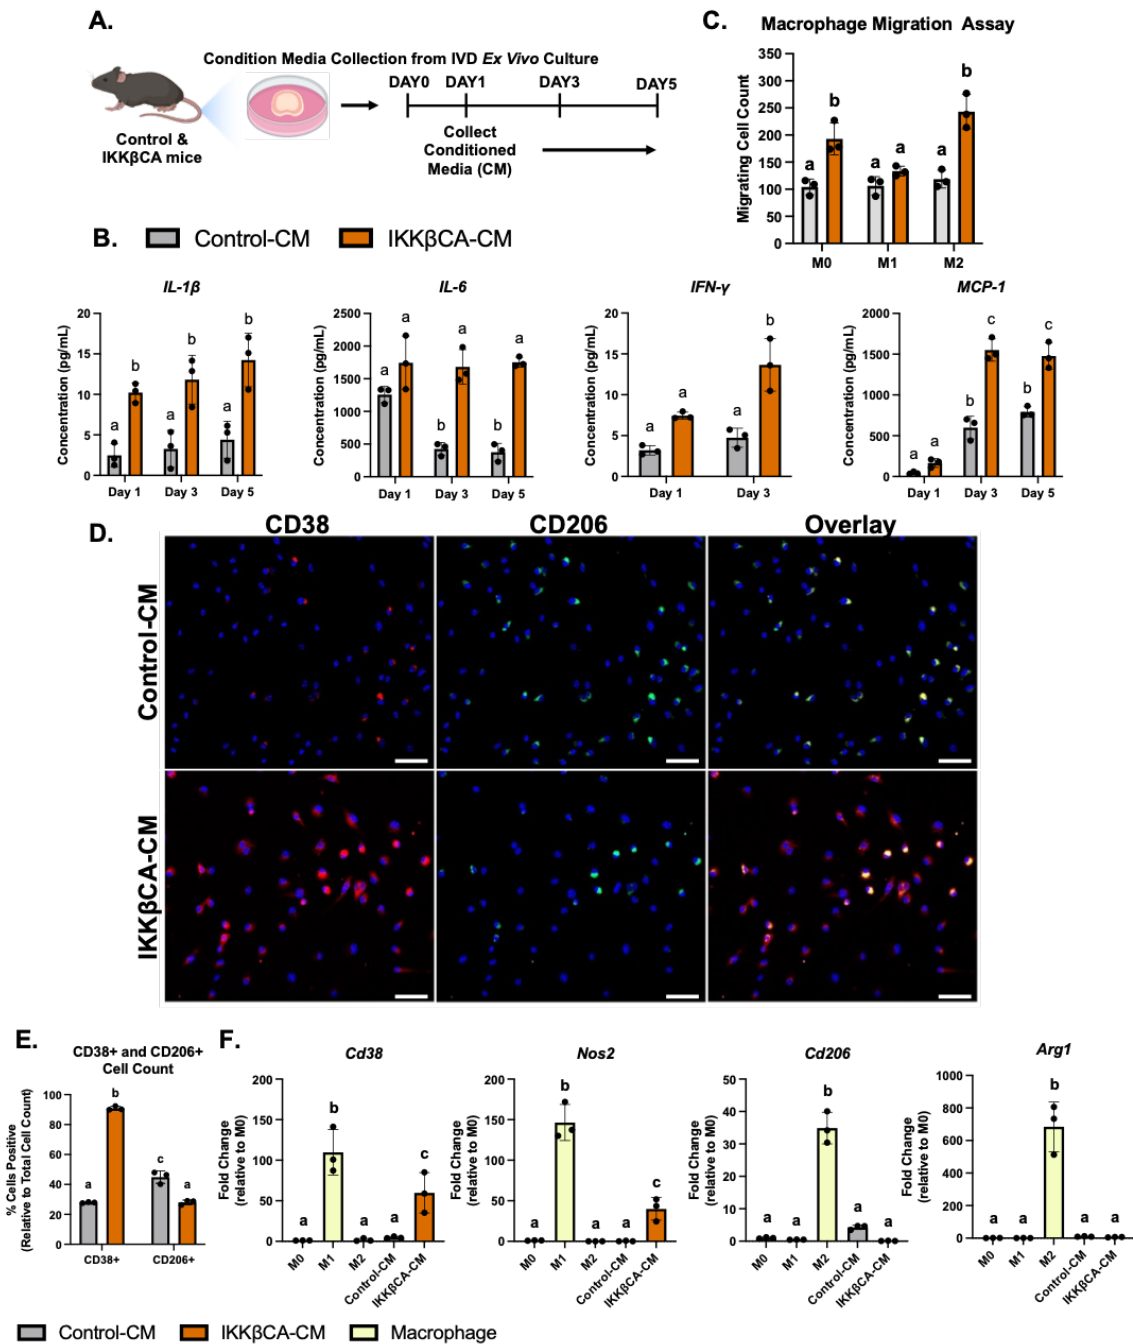

**Figure 7: IKK $\beta$ CA-CM increases macrophage migration and polarization towards an inflammatory phenotype.** (A) Study design schematic of whole organ *in vitro* culture and conditioned media collection. (B) Protein concentrations (pg/mL) within conditioned media analyzed after 1-, 3-, and 5-days in culture. Letters (a,b,c) indicating statistically significant ( $p < 0.05$ ) different groupings. (C) Quantification of M0, M1, and M2 macrophage migration through a transwell membrane via DAPI nuclear count. (D) Representative images of IF staining for CD38 and CD206 within BMDMs cultured in 2D monolayer and stimulated with control or IKK $\beta$ CA conditioned media. Scale bar = 100 $\mu$ m. (E) Quantification of % positivity for CD38 and CD206 within BMDMs treated with conditioned media. (F) Gene expression of M1 and M2 phenotypic markers within M0, M1, or M2 macrophages in basal media, or M0 macrophages with or without IVD conditioned media stimulation. Letters (a,b,c) indicating statistically significant ( $p < 0.05$ ) different groupings.

311 Next, in evaluating functional and phenotypic changes of macrophages exposed to IKK $\beta$ CA IVD,  
312 we investigated macrophage migration behavior toward control or IKK $\beta$ CA-CM. Macrophage  
313 migration across a transwell membrane (8 $\mu$ m) was quantified following culture with each CM. We  
314 saw an increase in naïve (M0) (p=0.0028) and M2 (p=0.0001) cell migration to IKK $\beta$ CA-CM  
315 when compared to control-CM (Fig. 7C, Fig. S3). No difference was observed in M1 macrophage  
316 migration (p=0.64) (Fig. 7C). To further investigate the effect of IKK $\beta$ CA microenvironment on  
317 macrophage phenotype, phenotypic markers for M1 (CD38, NOS2) and M2 macrophages (CD206,  
318 ARG1) were evaluated following *in vitro* stimulation of naïve macrophages with IKK $\beta$ CA or  
319 control IVD-CM. In IKK $\beta$ CA-CM, cells positive for CD38 were significantly higher (p<0.0001)  
320 while cells positive for CD206 (p<0.0001) were significantly lower compared to control-CM  
321 conditions (Fig. 7D,E). At the gene expression level, M1 macrophage markers *Cd38* (p=0.0123)  
322 and *Nos2* (p=0.0117) were significantly increased in M0 macrophages stimulated with IKK $\beta$ CA-  
323 CM compared to control-CM, while no significant changes were observed for the M2 macrophage  
324 markers *Cd206* and *Arg1* (Fig. 7F). *In vitro* results support the *in vivo* findings where NF- $\kappa$ B over-  
325 activation initiated inflammatory molecular changes in IVD cells which directly increased  
326 macrophage migration and polarization towards an M1 phenotype while suppressing M2  
327 polarization, possibly through secreted inflammatory mediators, IL-1 $\beta$ , IL-6, IFN- $\gamma$ .

328

329 To identify whether the inflammatory macrophage phenotype induced by IKK $\beta$ CA IVDs could be  
330 reversed, we evaluated the effect of subsequent treatment with an inflammatory-resolving M2  
331 secretome on macrophages initially stimulated by the IKK $\beta$ CA-CM or control-CM (Fig. 8A).  
332 Macrophages treated with basal media following IKK $\beta$ CA-CM stimulation exhibited the same  
333 level of positivity for CD38 and CD206 as macrophages maintained in IKK $\beta$ CA-CM for the

334 duration of the experiment. This suggests that washout of IKK $\beta$ CA-CM is not sufficient to  
 335 eliminate or reverse the pro-inflammatory phenotypic state (Fig. 8B,C). However, when cells from  
 336 IKK $\beta$ CA-CM group are subsequently treated with M2-CM, a significant decrease in CD38<sup>+</sup> cells  
 337 and significant increase in CD206<sup>+</sup> cells was observed ( $p < 0.0001$ ) (Fig. 8B,C).

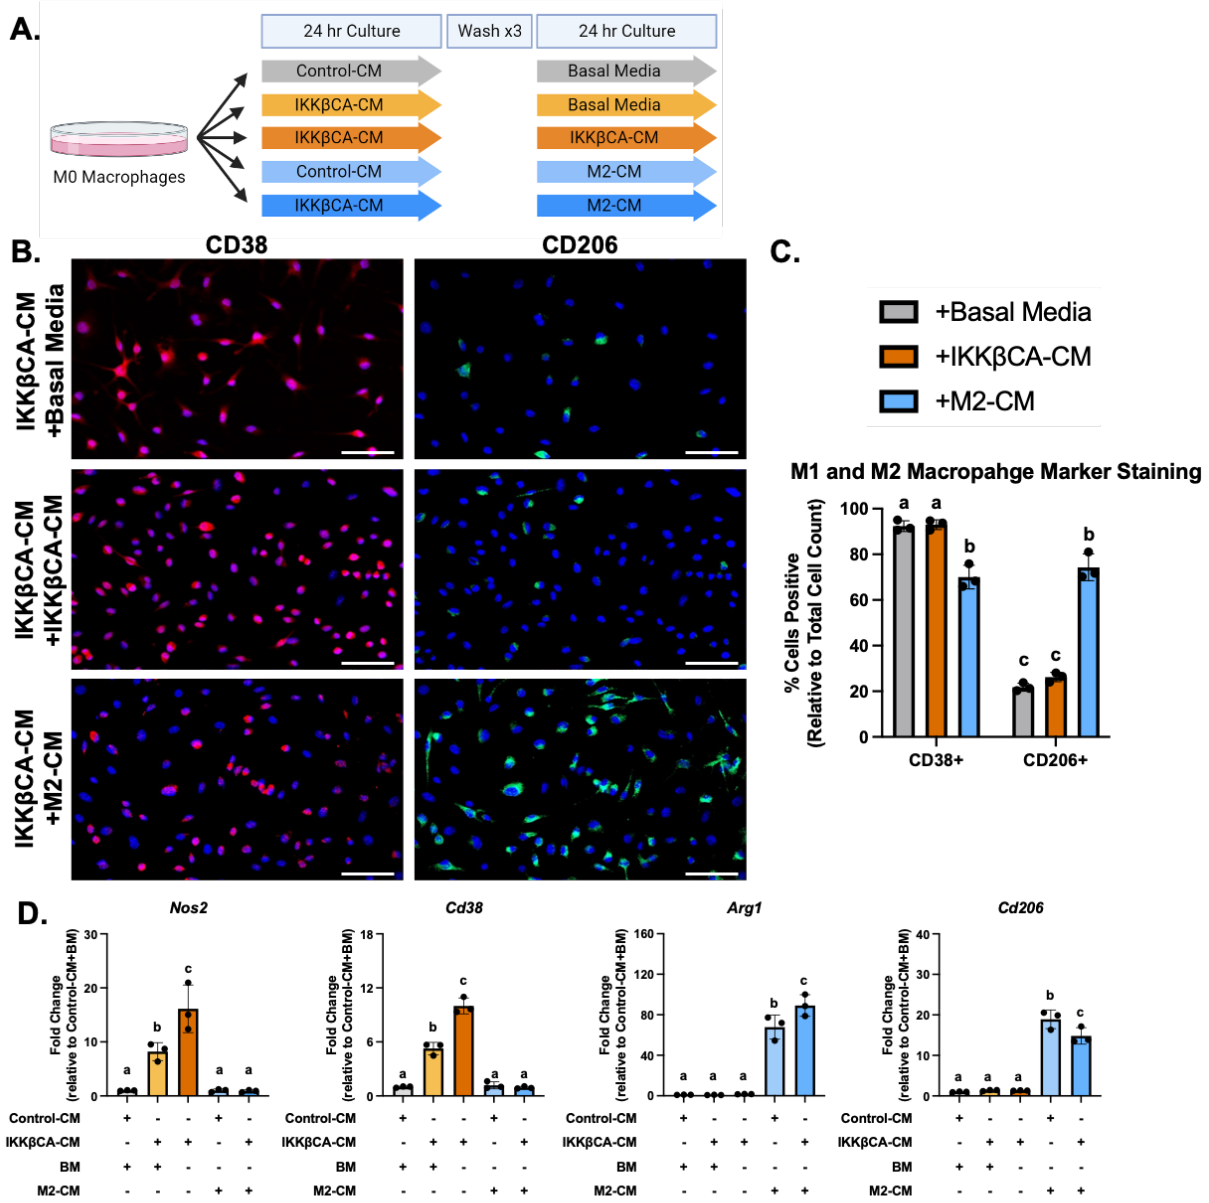

**Figure 8: IKK $\beta$ CA-CM mediated macrophage inflammatory responses are mitigated by co-stimulation with an M2 secretome. (A)** Study design schematic for CM stimulation of M0 macrophages. **(B)** Representative images of IF staining for CD38 and CD206 within BMDMs cultured in 2D monolayer and stimulated with IKK $\beta$ CA-CM followed by basal media or M2 macrophage CM. Scale bar = 100 $\mu$ m. **(C)** Quantification of % positivity for CD38 and CD206 within BMDMs following CM stimulation. **(D)** Gene expression of M1 and M2 phenotypic markers within M0 macrophages following CM stimulation. Letters (a,b,c) indicating statistically significant ( $p < 0.05$ ) different groupings.

338 Gene expression analysis results further support the findings, where M2-CM significantly  
339 decreased expression of *Nos2* ( $p < 0.0001$ ) and *Cd38* ( $p < 0.0001$ ), and increased expression of *Arg1*  
340 ( $p < 0.0001$ ) and *Cd206* ( $p < 0.0001$ ), when compared to groups treated with IKK $\beta$ CA-CM for  
341 duration of the study (Fig. 8D). Basal media treatment following IKK $\beta$ CA-CM also decreased  
342 *Nos2* ( $p < 0.01$ ) and *Cd38* ( $p < 0.0001$ ) expression compared to IKK $\beta$ CA-CM treatment for duration  
343 of the study, though expression levels remained significantly higher than cells treated with M2-  
344 CM following IKK $\beta$ CA-CM ( $p < 0.05$ ) (Fig. 8D). A greater increase in *Arg1* was achieved in M2-  
345 CM treatment following IKK $\beta$ CA-CM compared to M2-CM treatment of control cells ( $p < 0.0001$ )  
346 (Fig. 8D). Ultimately, these results suggest that M2-CM can reverse inflammatory polarization of  
347 macrophages activated by IVD cells over-expressing IKK $\beta$ , highlighting a therapeutic potential of  
348 M2 macrophages in initiating this resolution.

#### 349 **DISCUSSION:**

350 Utilizing an *AcanCreERT2;Ikk $\beta$ ca* mouse model, our findings indicate that prolonged NF- $\kappa$ B  
351 activation in IVD cells leads to severe structural degeneration with a complete loss of NP  
352 cellularity, loss of GAG content, shift of notochordal NP to a cartilaginous NP, and eventual  
353 fibrosis of the NP. These changes were associated with functional loss of IVD height and  
354 compressive mechanical properties. IVD structural changes were accompanied by increased  
355 macrophage recruitment and increases in gene expression of inflammatory cytokines, chemokines,  
356 catabolic enzymes, and neurotrophic factors within IVD tissue. These findings fill in a gap in  
357 evidence on the effects of prolonged inflammatory activation on IVD integrity, and support the  
358 utility of the *AcanCreERT2;Ikk $\beta$ ca* mouse to address key questions and evaluate therapeutics for  
359 treatment of persistent IVD inflammation and degeneration.

360

361 While macrophages are the most prominent immune cell present in degenerated human discs (27-  
362 29), there are conflicting reports about macrophage phenotype found in human DD. One study  
363 found both M1 (CCR7+) and remodeling M2c (CD163+) cells increased with human DD severity,  
364 particularly in regions with structural irregularities and defects (28). However, other human  
365 analyses found M2 cells to decrease significantly with degeneration while the proportion of M1  
366 polarized cells increased (30). In examining mechanisms contributing to severe DD within  
367 IKK $\beta$ CA IVDs, we observed increased presence of macrophages (F4/80+) within the outer AF of  
368 IKK $\beta$ CA mice, which consisted of M1 and M2 cell subsets, with an overall higher prevalence of  
369 M1 (CD38+) over M2 (CD206+) cells. Interestingly, the ratio of M1-to-M2 cells in IKK $\beta$ CA IVDs  
370 varied over time, with the highest levels occurring at 1- and 4-months post activation. However,  
371 by 6-months, the levels of M1 cells decreased significantly from peak levels, while the M2 cell  
372 levels remained elevated, resulting in an overall decrease in the M1-to-M2 ratio. These findings  
373 provide longitudinal evidence for the existence of temporal regulation of macrophage polarization  
374 in DD *in vivo*. Since signals encountered within the microenvironment drive the polarization of  
375 macrophages into distinct subsets (31), the findings on temporal changes in macrophage subsets  
376 suggests that macrophages may play a role in resolving the inflammatory cascade and promoting  
377 fibrosis in the IVD, which was indeed present in IKK $\beta$ CA IVDs. Interestingly, the shift toward  
378 increased pro-resolution occurred after the onset of substantial NP cell loss and matrix degradation,  
379 however the microenvironment was not devoid of M1 cells. Our results of dynamic macrophage  
380 populations during DD are consistent with prior studies identifying the presence of both M1 and  
381 M2 cells in a degenerative IVD (15). A puncture injury model of murine DD, where early  
382 recruitment of M1 macrophages followed by a delayed but sustained recruitment of M2  
383 macrophages was observed using flow cytometry (16). The results of the current study, therefore

384 extend findings in the literature regarding macrophage phenotype dynamics and localization across  
385 different tissue compartments in IVDs undergoing degeneration, in a more clinically relevant  
386 model than puncture wounding of the IVD. Whether this is the result of the heterogeneity of the  
387 macrophage population driven by phenotypic shift vs recruitment of varying cell subsets remains  
388 unknown.

389  
390 Secretome analysis from IKK $\beta$ CA IVDs provided evidence that soluble mediators are  
391 participating in the recruitment and activation of macrophages. We observed an increase in  
392 inflammatory mediators (IL-1 $\beta$ , IL-6, IFN- $\gamma$ ) and chemokines (MCP-1), which mimicked changes  
393 observed at the gene level. The IKK $\beta$ CA IVD secretome also directly activated macrophages via  
394 an increase in migration and increased inflammatory phenotypic gene (*Arg1*, *Cd38*) and cell  
395 surface markers (CD38), while decreasing anti-inflammatory phenotypic surface markers  
396 (CD206). Similar inflammatory inducing IVD-macrophage crosstalk has been observed within  
397 multiple *in vitro* studies where degenerated bovine (32) and human (33) IVD tissue was seen to  
398 polarize human macrophages towards a pro-inflammatory phenotype via increases in various  
399 inflammatory markers. Secretome analysis reveals possible chemokine targets, MCP-1 or MIF,  
400 which were found to be released by inflamed IVD cells and whose inhibition may ultimately  
401 mitigate degenerative changes mediated by infiltrating macrophages.

402  
403 Coinciding with the histological degenerative changes in this model, we observed increases in  
404 *Mmp3*, *Mmp9*, and *Adamts4* gene expression, losses in GAG staining and content, and loss of IVD  
405 height within IKK $\beta$ CA IVDs, which demonstrate a highly catabolic and degenerative tissue  
406 microenvironment. In a possible mechanistic role, macrophages have been seen to exacerbate *in*



407 *in vitro* inflammatory driven catabolic responses of rat IVD cells through an upregulation of  
408 inflammatory cytokine (*Cox2*) and catabolic enzyme (*Mmp3*, *Adamts4*) gene expression (34).  
409 Further, in another murine model examining IL-1 $\beta$  mediated inflammation and IVD, global IL-1ra  
410 deficiency resulted in increases in catabolic enzyme expression and degenerative ECM changes,  
411 though the presence of infiltrating immune cells was not evaluated (21). Together, the  
412 transcriptional changes and inflammatory macrophage activation observed within this model  
413 suggest a possible macrophage mediated mechanism driving the catabolic environment leading to  
414 severe DD.

415  
416 Due to their plastic nature, macrophages provide a dynamic therapeutic opportunity for harnessing  
417 the associated inflammatory-resolving and regenerative functions. This has been explored in the  
418 context of the IVD, where stimulation with human M2 macrophage CM mitigated inflammatory  
419 responses initiated by TNF $\alpha$  in human NP cells (35). Similarly, our results saw stimulation with  
420 an M2 secretome to reverse the inflammatory macrophage responses induced by IVD cells over-  
421 expressing IKK $\beta$ . Ultimately adding strong support for harnessing the potential of an M2  
422 macrophage within a chronically inflamed IVD tissue.

423  
424 The results presented here are consistent with prior studies utilizing NF- $\kappa$ B activation to study the  
425 role of persistent inflammation in musculoskeletal disease pathology, specifically tendinopathy  
426 and knee OA, and extend the understanding on immune cell crosstalk in musculoskeletal  
427 degeneration. Abraham et al. observed IKK $\beta$  mediated NF- $\kappa$ B over activation within tendon  
428 fibroblasts contributed to rotator cuff tendon degeneration and impaired healing driven by an  
429 upregulation in pro-inflammatory cytokines (5). Further, Catheline et al. saw IKK $\beta$  mediated

430 activation of the NF- $\kappa$ B subunit, p65, to accelerate a degenerative OA phenotype within articular  
431 cartilage driven by local pro-inflammatory secretory factors (36). Inversely, studies targeting the  
432 inhibition of NF- $\kappa$ B activation via genetic deletion or siRNA knockdown of p65 within murine  
433 models observed a protection from OA progression (37, 38). Though not all studies evaluated  
434 immune cell infiltration, increased immune cell presence was observed within the tendon and  
435 synovium of NF- $\kappa$ B over-expression models, however crosstalk between the inflamed tissue and  
436 immune cells was not evaluated (5, 36). Ultimately our work provides additional support for  
437 persistent inflammation being a primary cause of musculoskeletal disease progression while also  
438 adding novel insight into the role inflamed IVD cells play in recruiting and activating  
439 macrophages.

440

441 Limitations to this study include the well-known differences between murine and human IVDs  
442 (39). Nonetheless, findings from *in vivo* animal models inform relevant biological processes that  
443 may contribute to the better understanding of human DD. A second limitation is that while a similar  
444 upregulation of inflammatory cytokines, chemokines, and catabolic enzyme gene expression was  
445 observed in lumbar IVDs following NF- $\kappa$ B activation (Fig. S1), minimal changes were detected  
446 in lumbar IVD health (Fig. S4). Possible explanations for regional differences within IKK $\beta$ CA  
447 mice could be unique structural, mechanical properties and vascularity differences between lumbar  
448 and caudal IVDs (40, 41). Although the phenotypic differences limited the scope of this study to  
449 evaluating caudal IVDs, these results inspire future research questions. Further, the time point  
450 chosen for this study might have been insufficient to capture the changes in lumbar IVDs due to  
451 NF- $\kappa$ B over-activation, and thus, DD in lumbar IVDs may require longer time points post  
452 recombination.

453

454 In summary the findings of this study provide evidence that prolonged canonical IKK $\beta$ -NF- $\kappa$ B  
455 signaling pathway leads to accelerated DD by 4-months. Model characterization showed that IKK $\beta$   
456 overexpression within the IVD led to a decrease in IVD height, loss of IVD structure, composition,  
457 and cellularity, and loss in compressive mechanical properties. Moreover, IKK $\beta$  overexpression  
458 led to the recruitment of an activated macrophage population to the IVD. The increased production  
459 of inflammatory cytokine, chemokine, catabolic enzyme, and neurotrophic factor genes and  
460 proteins downstream of canonical NF- $\kappa$ B activation is believed to mediate these degenerative  
461 changes and to directly recruit and activate innate immune cells, such as macrophages. Lastly, we  
462 identified stimulation with an M2 macrophage secretome can mitigate the IVD cell driven  
463 inflammatory changes. Together these results provide support for characterizing the NF- $\kappa$ B  
464 mediated chronic inflammatory environment within the IVD, and provide a model for which  
465 therapeutic targets, including downstream targets of NF- $\kappa$ B and the utility of an inflammatory-  
466 resolving M2 macrophage, may be investigated for their potential in mediating chronic  
467 inflammation and subsequent severe DD.

468

## 469 **METHODS:**

### 470 *Mice*

471 Procedures involving the use of animals in this study were performed after attaining approval from  
472 the Institutional Animal Care and Use Committee at Columbia University. Conditional IKK $\beta$   
473 ‘gain-of-function’ *R26Stop<sup>FL</sup>ikk2ca* mice (JAX stock no. 008242) were used to induce canonical  
474 NF- $\kappa$ B pathway activation (42). Homozygous *Ikk2ca<sup>fl/fl</sup>* mice were bred to mice heterozygous for  
475 aggrecan (*Acan*) knock-in allele carrying tamoxifen-inducible form of Cre recombinase

476 (*Acan*<sup>CreERT2/+</sup>; JAX stock no. 019148) (43). Mice without CreER<sup>T2</sup> recombinase were used as  
477 controls (*Acan*<sup>+/+</sup>; *Ikk2ca*<sup>fl/fl</sup>, Control) for comparison to CreER<sup>T2</sup>-positive mice  
478 (*Acan*<sup>CreERT2/+</sup>; *Ikk2ca*<sup>fl/fl</sup>, IKKβCA). For initial *in vivo* histopathology analysis, Cre-mediated  
479 recombination was induced in skeletally mature (3-4 months-of-age) mice via intraperitoneal (IP)  
480 tamoxifen injections (0.1 or 0.3 mg/g of body weight dissolved in sunflower seed oil; Sigma-  
481 Aldrich, Cat. No. T5648) for 5 or 3 consecutive days, respectively. CreER<sup>T2</sup> negative littermate  
482 control mice received the same tamoxifen injection. IVDs were isolated from the caudal spine (C5-  
483 C10) between 1- to 6-months post IP recombination.

484

485 To evaluate Cre activity within the IVD, heterozygous *Acan*<sup>CreERT2/+</sup> mice were crossed with  
486 conditional *Ail4* reporter mice (JAX stock no. 007914) to generate *Acan*<sup>Cre</sup>; *Ail4* mice (44).  
487 Recombination was induced as described above, and IVDs were isolated from the caudal spine  
488 (C5-C10) either 3-days or 3-months following IP injection (both 0.3mg/g and 0.1mg/g of body  
489 weight doses) for assessment of localized Cre activity (Fig. 1).

490

### 491 ***Gene Expression***

492 Whole IVD tissues containing were isolated, snap frozen, and homogenized using a bead tissue  
493 homogenizer (Mikro-Dismembrator U, Sartorius) (n=4-6 per group). Total RNA was extracted  
494 using TRIzol and chloroform phase separation followed by RNA cleanup using spin columns  
495 (Qiagen) according to the manufacturer's protocol. Relative gene expression was quantified  
496 normalized to glyceraldehyde-3-phosphate dehydrogenase (*Gapdh*) using the  $\Delta\Delta C_T$  method (gene  
497 abbreviations and primer sequences listed in Table S1).

498

499 ***Histological analysis***

500 Caudal bone-disc-bone spine segments were fixed (4% paraformaldehyde, 24 hr), decalcified  
501 (14% EDTA, 10 days), and either processed for paraffin-embedding or soaked in sucrose and  
502 embedded in OCT for cryo-sectioning. Tissue structure was analyzed using paraffin embedded  
503 sagittal sections (7um) stained with either Safranin-O (cartilage/mucin), Alcian Blue  
504 (glycosaminoglycans, GAGs), or Picrosirius Red (Type I and III Collagen). Stained slides were  
505 imaged using an Axio Observer (Axiocam 503 color camera, Zeiss). Histomorphological analysis  
506 was performed using a previously described mouse specific histological grading system (24), with  
507 higher scores indicating increased tissue degeneration (n=4-17 samples per genotype and time  
508 point). Stained sections were scored blinded to experimental groups. Differences in histological  
509 scores between genotype groups was performed by comparing scores of IVDs collected from  
510 multiple levels in each animal.

511

512 ***Cellularity measurements***

513 Using the ImageJ software (NIH), hematoxylin (nuclear) or DAPI stained histological images were  
514 converted to 8-bit, auto-thresholded, converted to binary, and the cell number was quantified using  
515 analyze particles function within a custom-defined region of interests (ROIs) containing the outer  
516 AF or NP (45). Cell number measurements and ROI delineation were performed blinded to  
517 experimental group and analyzed comparing multi-level pooled IVDs between groups. (n=3-17  
518 samples per genotype and time point).

519

520 ***Fluoroscopy analysis***

521 IVD height was determined for analysis of digital fluoroscopy images (Glenbrook Technologies)  
522 taken following euthanasia and prior to IVD isolation. The DHI was calculated by averaging the  
523 IVD height and normalizing to adjacent vertebral body length (n=9-28 per group and time point)  
524 (46). Measurements were taken blinded to experimental group. DHI values were analyzed  
525 comparing multi-level pooled IVDs between groups.

526

527 ***Immunofluorescence microscopy and image analysis***

528 Paraffin embedded tissue sections were baked (60°C, 35 min), deparaffinized with xylene, and  
529 rehydrated using a graded series of ethanol washes. Antigen retrieval was performed with 0.1%  
530 Triton-X (10 min). Tissue sections were blocked (45 min) for non-specific binding using  
531 background buster (Innovex Biosciences). Sections were then incubated overnight at 4°C with  
532 primary antibodies. The next day, sections were incubated for 1 hr with secondary fluorescent  
533 antibodies. Primary and secondary antibodies and dilutions are listed in Table S2. Sections were  
534 mounted with DAPI anti-fade mounting medium (Vector, H-1200) before imaging with Axio  
535 Observer (Axiocam 702 mono camera, Zeiss). Exposure settings were fixed across all tissue  
536 sections during imaging.

537

538 For protein expression quantification, fluorescence images were converted to 8-bit and auto-  
539 thresholded, and a mean fluorescence intensity (MFI) was calculated using the measurement of  
540 mean grey value function within ImageJ (NIH) software. MFI measurements were taken within  
541 custom defined ROIs (NP, AF, and EP) drawn blind to experimental groups. For nuclear MFI

542 measurements, nuclear ROIs were created by converting DAPI stained sections to nuclear masks  
543 and measuring MFI within (n=4-12 samples per group and time point).

544

545 Cryo-embedded tissues were sectioned (7  $\mu\text{m}$ ) and signal recovery of the fluorescent reporter  
546 tdTomato was carried out. Sections were re-hydrated, antigen retrieval and peptide blocking was  
547 performed as detailed above. To enhance the tdTomato signal, cryo-sectioned tissues were  
548 incubated overnight at 4°C with primary antibodies followed by a 1 hr incubation with secondary  
549 fluorescent antibodies at room temperature (Table S2). Sections were mounted (DAPI) and imaged  
550 as described above (n= 3 samples per genotype and time point).

551

## 552 *Immunohistochemistry*

553 Paraffin embedded tissue sections were deparaffinized as described prior. Antigen retrieval was  
554 performed using hyaluronidase solution (Sigma H3506, 100  $\mu\text{g}/\text{mL}$ ) at 37°C for 12 min.  
555 Endogenous peroxidase and protein blocking steps were performed using reagents provided in the  
556 ABC detection kit (Abcam, ab64261). Sections were incubated overnight with primary antibodies  
557 at 4°C (Table S2). The next day, sections were incubated with secondary antibodies and DAB  
558 staining using reagents provided in the Abcam kit, according to the manufacturer's protocol.  
559 Sections were dehydrated, counterstained with 0.5% methyl green (Sigma, 198080), mounted with  
560 Permount mounting medium (Fisher Scientific, SP15), and imaged (Axiocam 503 color camera,  
561 Zeiss).

562

563 ***Mechanical testing***

564 IVDs were mechanically tested on a TA Electroforce DMA 3200 Mechanical Tester. Prior to  
565 mechanical testing IVDs were thawed in PBS (37°C, 1 hr). IVD height (mm) and cross-sectional  
566 area (area of an ellipse, mm<sup>2</sup>) of the IVDs were approximated using fluoroscopy imaging with  
567 ImageJ software. For IVD height and cross-sectional area measurements IVD samples containing  
568 the intact NP, AF, and CEPs were micro-dissected and imaged. Unconfined compression testing  
569 was performed between two impermeable platens (WinTest). A 0.02N preload was applied to each  
570 sample followed by 20 cycles of sinusoidal loading at 0.1 Hz to a maximum load of 0.25N (1x  
571 body weight). This was followed by equilibrium creep testing, where a load ramp of 0.25N was  
572 applied over 5 seconds and held for 1200 seconds. Dynamic Modulus (MPa) was calculated from  
573 the ratio of the applied stress and measured strain during the 20th cycle of dynamic loading to  
574 allow for repeatable sample displacement hysteresis. The resulting equilibrium strain (mm/mm)  
575 and equilibrium modulus (MPa: applied stress/strain) at end of the hold was measured.  
576 Measurements were analyzed using multi-level pooled IVDs between groups (n=3-18 per group  
577 and time point).

578

579 ***Glycosaminoglycan Analysis***

580 Whole IVDs were digested overnight in papain (0.3 mg/mL) in 100mM sodium acetate, 10mM  
581 cysteine HCl, and 50mM EDTA. A dimethylmethylene blue (DMMB) assay was used to quantify  
582 GAG content within IVD tissue digests (47). GAG content was normalized to total DNA measured  
583 within IVD tissue digests using Pico Green Assay (n=3-18 per genotype and time point).  
584 Measurements were analyzed using multi-level pooled IVDs between groups.

585



### 586 ***Ex vivo Culture and Generation of Conditioned Media***

587 To isolate the effects of IVD inflammation, we established IVD *ex vivo* culture to generate CM.  
588 IKK $\beta$ CA and Control mice at 1-week post recombination was sacrificed and 5 caudal IVDs were  
589 microdissected. After serial washes in phosphate buffered saline (PBS and Hank's balanced salt  
590 solution, IVDs were cultured in DMEM/F12 with 5% Fetal Bovine Serum (FBS, Crystalgen, Cat  
591 #FBS-500HI) and 1 % Penicillin-Streptomycin. Media was changed every 2 days and CM from  
592 Day 1, 3, and 5 in culture were collected.

593

### 594 ***Cytokine Immunoassay***

595 Secreted cytokine levels into the collected IKK $\beta$ CA- and Control-CMs were measured using 9-  
596 Plex LEGENDPlex mouse inflammation panel (BioLegend, Cat #740446) according to  
597 manufacturer's protocol. The predefined panel enabled simultaneous quantification of 9 cytokines:  
598 CCL2 (MCP-1), GM-CSF, IFN- $\beta$ , IFN- $\gamma$ , IL-1 $\alpha$ , IL-1 $\beta$ , IL-6, IL-10, TNF- $\alpha$ .

599

### 600 ***Bone Marrow Derived Macrophage Isolation and Culture***

601 Femur and tibia isolated from wild type C57BL/6 mice at 3 months-of-age were washed in ice  
602 cold PBS and stored in ice cold RPMI media (ThermoFisher, Cat # 11875093). Following  
603 dissection, long bones were transferred to the sterile biosafety cabinet and their bone marrows  
604 were flushed using 1mL of sterile RPMI media using 27G needle. The collected flow through was  
605 resuspended in 30 mL of complete macrophage media, containing RPMI, 10% FBS (GeminiBio,  
606 Cat #100-106), 30% L929 conditioned media (LCM), and 1 % Penicillin-Streptomycin. The cell  
607 suspension was split into three 6 cm petri dish and cultured until 80% confluency, with media  
608 change every 2 days.

609

### 610 *Macrophage Polarization and Transwell Migration Assay*

611 Upon desired confluency, macrophages were chemically stimulated for 24 h to take on either M1  
612 or M2 phenotypes. For M1 polarization, macrophages were treated with 100 ng/mL LPS (Sigma,  
613 Cat #L2630-10MG) and 20 ng/mL IFN $\gamma$  (Shenandoah Biotech, Cat #200-16) in complete  
614 macrophage media. For M2 polarization, macrophages were treated with 20 ng/mL IL-4  
615 (Shenandoah Biotech, Cat #200-18) and 20 ng/mL IL-13(Shenandoah Biotech, Cat #200-22).  
616 Cells cultured with complete macrophage media was used as M0 group.

617

618 After polarization,  $1.0 \times 10^5$  cells were seeded at the top of the transwell insert (8  $\mu$ m pore size,  
619 Corning, Cat # 3422) positioned into the well with 500  $\mu$ L of either IKK $\beta$ CA-CM or Control-CM  
620 collected at Day 3 in culture. Cells were incubated in normoxia for 24 h, fixed in 4%  
621 paraformaldehyde and cells at the top of the transwell membrane were removed using cotton swab.  
622 Migrated cells located at the bottom side of the transwell membrane were permeabilized with 0.1%  
623 Triton X-100 in PBS and the transwell membrane was coverslipped with mounting medium  
624 containing DAPI (Vector Labs, Cat # H-1800-2). For each transwell, four different fields of view  
625 were imaged, and the number of migrated cells were analyzed by counting the number of DAPI-  
626 stained nuclei using ImageJ. Cell count of each transwell is an average count of four different  
627 fields of view.

628

### 629 *Macrophage Polarization using Conditioned Media*

630 To investigate the effects of conditioned media on macrophage polarization, M0 macrophages  
631 were exposed to either IKK $\beta$ CA-CM or Control-CM at 1:1 solution with complete macrophage

632 media for 24 hours. Following exposure to the CMs, cells were washed with DPBS and were  
633 subjected to either RNA isolation or fixed in 4% PFA for 10 minutes for immunocytochemistry  
634 (ICC) analysis.

635

636 For sequential polarization study, M0 macrophages exposed to either IKK $\beta$ CA-CM or Control-  
637 CM for 24 hours were then washed three times with DPBS and cultured in M2-CM for 24 hours.  
638 After sequential polarization, cells were harvested for RNA isolation and ICC analysis. M2-CM  
639 was generated using chemically stimulated M2 macrophages, washed three times in DPBS,  
640 cultured in complete macrophage media for 24 hours, after which the media was collected (Figure  
641 8B).

642

### 643 *Immunocytochemistry*

644 Following fixation, cells were washed with PBS, permeabilized with 0.1% Triton X-100 for 15  
645 min. and blocked using 1% Bovine Serum Albumin (BSA) in PBS for 45 min. Samples were  
646 double stained with primary antibodies against overnight at 4°C. After incubation, cells were  
647 washed with PBS three times, and cells were incubated with secondary antibodies for 1 hr at room  
648 temperature. Following staining, cells were washed three times with PBS and mounted onto a glass  
649 slide with VectaShield DAPI mounting solution (Vector Labs, Cat # H-1800-10). For each sample,  
650 four different fields of view were imaged, and the total number of cells, and cells positive for CD38  
651 or CD206 were manually counted. Percent cell positivity for each surface marker was calculated  
652 by dividing the number of cells positive for each surface marker by total number of cells in the  
653 field of view. Each data point of percent cell positivity is an average count of four different fields  
654 of view.

655

656 ***Statistics***

657 Differences between genotype groups were analyzed with Student's t-test with multiple  
658 comparison correction using Holm-Šídák in Prism (V8.3.1). Differences across *in vitro*  
659 conditioned media stimulation groups were analyzed using ANOVA with multiple comparison  
660 correction using Holm-Šídák in Prism (V8.3.1).  $p < 0.05$  considered significant, and  $p < 0.1$   
661 considered a trend.

662 **REFERENCES:**

663

- 664 1. Murray, C.J., et al., *The state of US health, 1990-2010: burden of diseases, injuries, and*  
665 *risk factors*. *Jama*, 2013. **310**(6): p. 591-606.
- 666 2. Katz, J.N., *Lumbar disc disorders and low-back pain: socioeconomic factors and*  
667 *consequences*. *JBJS*, 2006. **88**(suppl\_2): p. 21-24.
- 668 3. Luoma, K., et al., *Low back pain in relation to lumbar disc degeneration*. *Spine*, 2000. **25**.
- 669 4. Nerlich, A.G., et al., *Immunomorphological Analysis of RAGE Receptor Expression and NF-*  
670 *κB Activation in Tissue Samples from Normal and Degenerated Intervertebral Discs of*  
671 *Various Ages*. *Annals of the New York Academy of Sciences*, 2007. **1096**(1): p. 239-248.
- 672 5. Abraham, A.C., et al., *Targeting the NF-κB signaling pathway in chronic tendon disease*.  
673 *Science translational medicine*, 2019. **11**(481): p. eaav4319.
- 674 6. Gu, R., et al., *MicroRNA-9 regulates the development of knee osteoarthritis through the*  
675 *NF-kappaB1 pathway in chondrocytes*. *Medicine*, 2016. **95**(36).
- 676 7. Aupperle, K.R., et al., *NF-κB regulation by IκB kinase in primary fibroblast-like*  
677 *synoviocytes*. *The Journal of Immunology*, 1999. **163**(1): p. 427-433.
- 678 8. Liu, T., et al., *NF-κB signaling in inflammation*. *Signal transduction and targeted therapy*,  
679 2017. **2**(1): p. 1-9.
- 680 9. Fujita, T., et al., *Independent modes of transcriptional activation by the p50 and p65*  
681 *subunits of NF-kappa B*. *Genes & development*, 1992. **6**(5): p. 775-787.
- 682 10. Burke, J., et al., *Intervertebral discs which cause low back pain secrete high levels of*  
683 *proinflammatory mediators*. *The Journal of bone and joint surgery. British volume*, 2002.  
684 **84**(2): p. 196-201.
- 685 11. Le Maitre, C.L., J.A. Hoyland, and A.J. Freemont, *Catabolic cytokine expression in*  
686 *degenerate and herniated human intervertebral discs: IL-1β and TNFα expression profile*.  
687 *Arthritis research & therapy*, 2007. **9**(4): p. R77.
- 688 12. Pockert, A.J., et al., *Modified expression of the ADAMTS enzymes and tissue inhibitor of*  
689 *metalloproteinases 3 during human intervertebral disc degeneration*. *Arthritis &*  
690 *Rheumatology*, 2009. **60**(2): p. 482-491.
- 691 13. Le Maitre, C.L., A.J. Freemont, and J.A. Hoyland, *Localization of degradative enzymes and*  
692 *their inhibitors in the degenerate human intervertebral disc*. *J Pathol*, 2004. **204**.
- 693 14. Liacini, A., et al., *Induction of matrix metalloproteinase-13 gene expression by TNF-α is*  
694 *mediated by MAP kinases, AP-1, and NF-κB transcription factors in articular chondrocytes*.  
695 *Experimental cell research*, 2003. **288**(1): p. 208-217.
- 696 15. Nakazawa, K.R., et al., *Accumulation and localization of macrophage phenotypes with*  
697 *human intervertebral disc degeneration*. *The Spine Journal*, 2018. **18**(2): p. 343-356.
- 698 16. Nakawaki, M., et al., *Changes in nerve growth factor expression and macrophage*  
699 *phenotype following intervertebral disc injury in mice*. *Journal of Orthopaedic Research®*,  
700 2019. **37**(8): p. 1798-1804.
- 701 17. Kawakubo, A., et al., *Investigation of resident and recruited macrophages following disc*  
702 *injury in mice*. *Journal of Orthopaedic Research®*, 2020.
- 703 18. Tilstra, J.S., et al., *NF-κB in aging and disease*. *Aging and disease*, 2011. **2**(6): p. 449.

- 704 19. Hayden, M., A. West, and S. Ghosh, *NF- $\kappa$ B and the immune response*. *Oncogene*, 2006.  
705 **25**(51): p. 6758-6780.
- 706 20. Gorth, D.J., I.M. Shapiro, and M.V. Risbud, *Transgenic mice overexpressing human TNF- $\alpha$*   
707 *experience early onset spontaneous intervertebral disc herniation in the absence of overt*  
708 *degeneration*. *Cell death & disease*, 2018. **10**(1): p. 1-14.
- 709 21. Phillips, K.L.E., et al., *Interleukin-1 receptor antagonist deficient mice provide insights into*  
710 *pathogenesis of human intervertebral disc degeneration*. *Annals of the rheumatic*  
711 *diseases*, 2013. **72**(11): p. 1860-1867.
- 712 22. Gorth, D.J., I.M. Shapiro, and M.V. Risbud, *A new understanding of the role of IL-1 in age-*  
713 *related intervertebral disc degeneration in a murine model*. *Journal of Bone and Mineral*  
714 *Research*, 2019. **34**(8): p. 1531-1542.
- 715 23. Swamy, G., et al., *IL-1Ra deficiency accelerates intervertebral disc degeneration in C57BL/6J*  
716 *mice*. *JOR spine*, 2022. **5**(2): p. e1201.
- 717 24. Tam, V., et al., *Histological and reference system for the analysis of mouse intervertebral*  
718 *disc*. *Journal of Orthopaedic Research®*, 2018. **36**(1): p. 233-243.
- 719 25. Boos, N., et al., *Classification of age-related changes in lumbar intervertebral discs: 2002*  
720 *Volvo Award in basic science*. *Spine*, 2002. **27**(23): p. 2631-2644.
- 721 26. Benneker, L.M., et al., *Correlation of radiographic and MRI parameters to morphological*  
722 *and biochemical assessment of intervertebral disc degeneration*. *European spine journal*,  
723 2005. **14**(1): p. 27-35.
- 724 27. Yang, C., et al., *Differential expression of p38 MAPK alpha, beta, gamma, delta isoforms*  
725 *in nucleus pulposus modulates macrophage polarization in intervertebral disc*  
726 *degeneration*. *Sci Rep*, 2016. **6**: p. 22182.
- 727 28. Nakazawa, K.R., et al., *Accumulation and localization of macrophage phenotypes with*  
728 *human intervertebral disc degeneration*. *Spine J*, 2018. **18**(2): p. 343-356.
- 729 29. Nerlich, A.G., et al., *Immunolocalization of phagocytic cells in normal and degenerated*  
730 *intervertebral discs*. *Spine (Phila Pa 1976)*, 2002. **27**(22): p. 2484-90.
- 731 30. Ling, Z., et al., *Single-Cell RNA-Seq Analysis Reveals Macrophage Involved in the*  
732 *Progression of Human Intervertebral Disc Degeneration*. *Front Cell Dev Biol*, 2021. **9**: p.  
733 833420.
- 734 31. Shapouri-Moghaddam, A., et al., *Macrophage plasticity, polarization, and function in*  
735 *health and disease*. *Journal of cellular physiology*, 2018. **233**(9): p. 6425-6440.
- 736 32. Silva, A.J., et al., *Macrophages down-regulate gene expression of intervertebral disc*  
737 *degenerative markers under a pro-inflammatory microenvironment*. *Frontiers in*  
738 *immunology*, 2019. **10**: p. 1508.
- 739 33. Yang, C., et al., *Differential expression of p38 MAPK  $\alpha$ ,  $\beta$ ,  $\gamma$ ,  $\delta$  isoforms in nucleus pulposus*  
740 *modulates macrophage polarization in intervertebral disc degeneration*. *Scientific*  
741 *reports*, 2016. **6**(1): p. 1-12.
- 742 34. Yang, H., et al., *Secreted factors from intervertebral disc cells and infiltrating macrophages*  
743 *promote degenerated intervertebral disc catabolism*. *Spine*, 2019. **44**(9): p. E520-E529.
- 744 35. Li, X.C., et al., *M2 macrophage-conditioned medium inhibits intervertebral disc*  
745 *degeneration in a tumor necrosis factor- $\alpha$ -rich environment*. *Journal of Orthopaedic*  
746 *Research®*, 2022. **40**(11): p. 2488-2501.

- 747 36. Catheline, S.E., et al., *IKK $\beta$ –NF- $\kappa$ B signaling in adult chondrocytes promotes the onset of*  
748 *age-related osteoarthritis in mice*. *Science signaling*, 2021. **14**(701): p. eabf3535.
- 749 37. Kobayashi, H., et al., *Biphasic regulation of chondrocytes by Rel $\alpha$  through induction of anti-*  
750 *apoptotic and catabolic target genes*. *Nature communications*, 2016. **7**(1): p. 13336.
- 751 38. Yan, H., et al., *Suppression of NF- $\kappa$ B activity via nanoparticle-based siRNA delivery alters*  
752 *early cartilage responses to injury*. *Proceedings of the National Academy of Sciences*,  
753 2016. **113**(41): p. E6199-E6208.
- 754 39. Alini, M., et al., *Are animal models useful for studying human disc*  
755 *disorders/degeneration?* *European Spine Journal*, 2008. **17**(1): p. 2-19.
- 756 40. Brendler, J., et al., *Histological differences between lumbar and tail intervertebral discs in*  
757 *mice*. *Journal of Anatomy*, 2022. **240**(1): p. 84-93.
- 758 41. Sarver, J.J. and D.M. Elliott, *Mechanical differences between lumbar and tail discs in the*  
759 *mouse*. *Journal of Orthopaedic Research*, 2005. **23**(1): p. 150-155.
- 760 42. Sasaki, Y., et al., *Canonical NF- $\kappa$ B activity, dispensable for B cell development, replaces*  
761 *BAFF-receptor signals and promotes B cell proliferation upon activation*. *Immunity*, 2006.  
762 **24**(6): p. 729-739.
- 763 43. Henry, S.P., et al., *Generation of aggrecan-CreERT2 knockin mice for inducible Cre activity*  
764 *in adult cartilage*. *Genesis*, 2009. **47**(12): p. 805-814.
- 765 44. Madisen, L., et al., *A robust and high-throughput Cre reporting and characterization*  
766 *system for the whole mouse brain*. *Nature neuroscience*, 2010. **13**(1): p. 133.
- 767 45. Schneider, C.A., W.S. Rasband, and K.W. Eliceiri, *NIH Image to ImageJ: 25 years of image*  
768 *analysis*. *Nature methods*, 2012. **9**(7): p. 671-675.
- 769 46. Masuda, K., et al., *A novel rabbit model of mild, reproducible disc degeneration by an*  
770 *anulus needle puncture: correlation between the degree of disc injury and radiological and*  
771 *histological appearances of disc degeneration*. *Spine*, 2005. **30**(1): p. 5-14.
- 772 47. Farndale, R.W., C.A. Sayers, and A.J. Barrett, *A direct spectrophotometric microassay for*  
773 *sulfated glycosaminoglycans in cartilage cultures*. *Connective tissue research*, 1982. **9**(4):  
774 p. 247-248.  
775

## 776 ACKNOWLEDGMENTS:

777 This work was supported in part by grants from the NIH R01AR069668, R01AR077760, and  
778 R21AR080516. Flow cytometry experiments were performed in the Columbia Stem Cell Initiative  
779 Flow Cytometry core facility at Columbia University Irving Medical Center under the leadership  
780 of Michael Kissner. **Competing interests:** The authors declare that they have no competing  
781 interests. **Data and materials availability:** All data needed to evaluate the conclusions in the

782 paper are present in the paper and/or the Supplementary Materials. Additional data generated and  
783 analyzed during this study may be requested from the authors.

784

785 **FIGURE CAPTIONS:**

786 Figure 1: The *Acan*<sup>CreERT2</sup> mouse targets all compartments of the IVD and GP. Representative  
787 images of IF staining for RFP within mid sagittal sections of (A,C) *Acan*<sup>Cre<sup>-</sup></sup>; *Ail4* and (B,D)  
788 *Acan*<sup>Cre<sup>+</sup></sup>; *Ail4* reporter mice 3-days and 3-months following tamoxifen IP injections. NP, AF,  
789 EP, GP compartments are delineated (white dashed lines).

790

791 Figure 2: IKK $\beta$  over-expression and NF- $\kappa$ B activation within IKK $\beta$ CA mice. (A) Representative  
792 images of IHC staining for IKK $\beta$  within mid sagittal sections of 1-month control and IKK $\beta$ CA  
793 discs. Scale bar = 100 $\mu$ m. (B) Gene expression of *Ikk2* within IVDs expressed as fold change  
794 relative to control. (C) Representative IF staining for phosphorylated p65 (green) within mid  
795 sagittal sections of control and IKK $\beta$ CA discs. Scale bar = 50 $\mu$ m. (D) Nuclear MFI quantification  
796 (normalized to control within time point) of phosphorylated p65. \*p<0.05, \*\*p<0.01.

797

798 Figure 3: IKK $\beta$  over-expression upregulates inflammatory cytokine, chemokine, catabolic  
799 enzyme, and neurotrophic factor gene expression. Gene expression changes (relative to control)  
800 from total RNA isolated from control and IKK $\beta$ CA whole IVDs containing NP, AF, and EP, 1-  
801 week and 2-months post recombination. \*p<0.05, \*\*p<0.01, \*\*\*p<0.001.

802

803 Figure 4: IKK $\beta$  over-expression produces severe DD. (A) Representative images of safranin-O  
804 stained mid sagittal sections of control and IKK $\beta$ CA IVDs 1-, 2-, 4-, and 6-months post



805 recombination. Scale bar = 250 $\mu$ m. Histological scoring legend, ranging from 0 (healthy) to 14  
806 (most severe). (B) Distribution of histological scores. (C) Histological scoring within NP, AF, and  
807 NP:AF border compartments, and total score. (D) Representative images of safranin-O stained  
808 mid sagittal sections of control and IKK $\beta$ CA IVDs at 1-, 2-, 4-, and 6-months post recombination.  
809 Scale bar = 250 $\mu$ m. (E) Representative images of DAPI (nuclear) stained mid sagittal sections.  
810 Scale bar = 100 $\mu$ m. (F) Quantification of NP cellularity within hand drawn ROIs of DAPI nuclear  
811 stained mid sagittal sections. \* $p$ <0.05, \*\*\*\* $p$ <0.0001.

812

813 Figure 5: IKK $\beta$  over-expression mediates a loss of ECM, disc height, and weakened mechanical  
814 properties. (A) Representative Alcian blue (GAG) and (B) Picrosirius red (collagen) stained  
815 images of control and IKK $\beta$ CA IVDs mid sagittal sections at 2-, 4-, and 6-months post  
816 recombination. Scale bar = 100 $\mu$ m. (C) Representative fluoroscopic images of control and  
817 IKK $\beta$ CA C6-C8 IVDs 3- and 6-months post recombination. Scale bar = 1mm. (D) IVD height  
818 quantified via DHI of control and IKK $\beta$ CA discs 3- and 6-months post recombination. (E) GAG  
819 content ( $\mu$ g) normalized to total DNA content ( $\mu$ g) within control and IKK $\beta$ CA IVD digests 2-  
820 and 3-months post recombination. (F) Dynamic modulus (MPa), creep equilibrium strain  
821 (mm/mm) and equilibrium modulus (MPa) of control and IKK $\beta$ CA discs 2- and 3-months post  
822 recombination. \* $p$ <0.05, \*\* $p$ <0.01, \*\*\* $p$ <0.001, \*\*\*\* $p$ <0.0001.

823

824 Figure 6: IKK $\beta$  over-expression increases macrophage presence within the IVD. (A)  
825 Representative images of IF staining for F4/80, CD38, and CD206 in mid sagittal sections of  
826 control and IKK $\beta$ CA discs 1-, 4-, and 6-months post recombination. Scale bar = 100 $\mu$ m. (B) MFI  
827 quantification of F4/80, CD38, and CD206 expression within individual NP, AF, and EP

828 compartments. Letters (a,b,c) indicating statistically significant ( $p < 0.05$ ) different groupings. (C)  
829 Representative images of whole disc sagittal sections of control and IKK $\beta$ CA discs 4-months post  
830 recombination with delineation of tissue compartments. Scale bar = 200 $\mu$ m.

831

832 Figure 7: IKK $\beta$ CA-CM increases macrophage migration and polarization towards an  
833 inflammatory phenotype. (A) Study design schematic of whole organ *in vitro* culture and  
834 conditioned media collection. (B) Protein concentrations (pg/mL) within conditioned media  
835 analyzed after 1-, 3-, and 5-days in culture. Letters (a,b,c) indicating statistically significant  
836 ( $p < 0.05$ ) different groupings. (C) Quantification of M0, M1, and M2 macrophage migration  
837 through a transwell membrane via DAPI nuclear count. (D) Representative images of IF staining  
838 for CD38 and CD206 within BMDMs cultured in 2D monolayer and stimulated with control or  
839 IKK $\beta$ CA conditioned media. Scale bar = 100 $\mu$ m. (E) Quantification of % positivity for CD38 and  
840 CD206 within BMDMs treated with conditioned media. (F) Gene expression of M1 and M2  
841 phenotypic markers within M0, M1, or M2 macrophages in basal media, or M0 macrophages with  
842 or without IVD conditioned media stimulation. Letters (a,b,c) indicating statistically significant  
843 ( $p < 0.05$ ) different groupings.

844

845 Figure 8: IKK $\beta$ CA-CM mediated macrophage inflammatory responses are mitigated by co-  
846 stimulation with an M2 secretome. (A) Study design schematic for CM stimulation of M0  
847 macrophages. (B) Representative images of IF staining for *CD38* and *CD206* within BMDMs  
848 cultured in 2D monolayer and stimulated with IKK $\beta$ CA-CM followed by basal media or M2  
849 macrophage CM. Scale bar = 100 $\mu$ m. (C) Quantification of % positivity for *CD38* and *CD206*  
850 within BMDMs following CM stimulation. (D) Gene expression of M1 and M2 phenotypic

851 markers within M0 macrophages following CM stimulation. Letters (a,b,c) indicating statistically  
852 significant ( $p < 0.05$ ) different groupings.

853

854

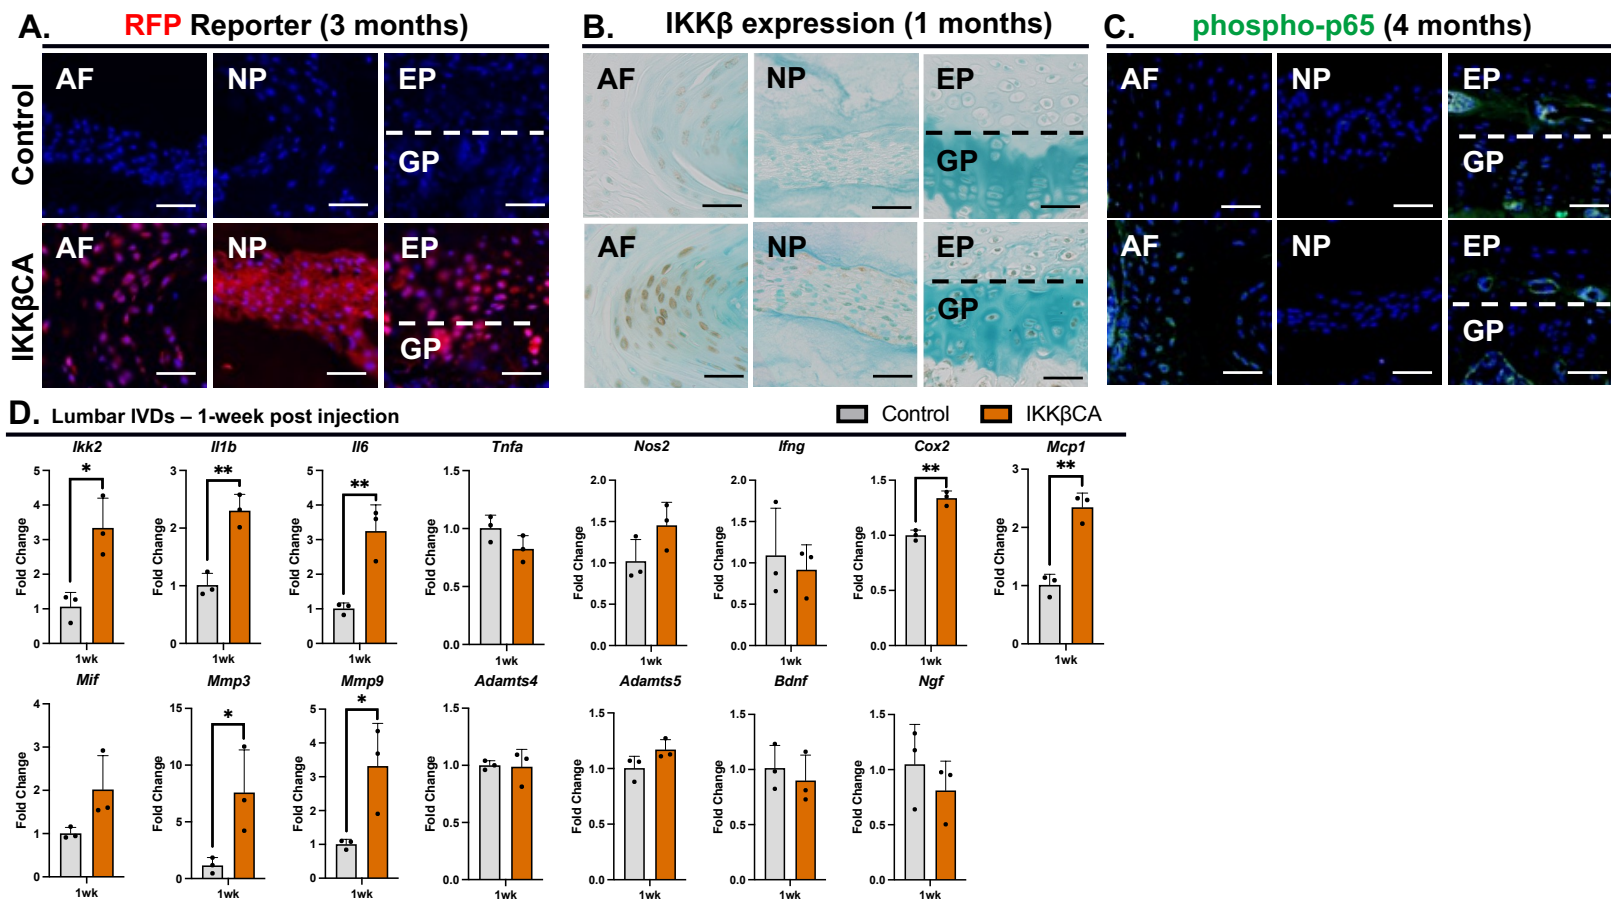

**Figure S1: Cre-activity, NF- $\kappa$ B activation, and gene expression changes within lumbar IVDs. (A)** Representative images of IF staining for RFP in control and IKK $\beta$ CA mid coronal lumbar IVD sections. Scale bar = 50 $\mu$ m. **(B)** Representative images of IHC staining for IKK $\beta$  within mid coronal sections of 1-month control and IKK $\beta$ CA lumbar IVDs. Scale bar = 50 $\mu$ m. **(C)** Representative images of IF staining for phospho-p65 in control and IKK $\beta$ CA mid coronal lumbar IVD sections. Scale bar = 50 $\mu$ m. **(D)** Gene expression changes (relative to control) from total RNA isolated from control and IKK $\beta$ CA whole lumbar IVDs containing NP, AF, and EP, 1-week post recombination. \* $p$ <0.05, \*\* $p$ <0.01.

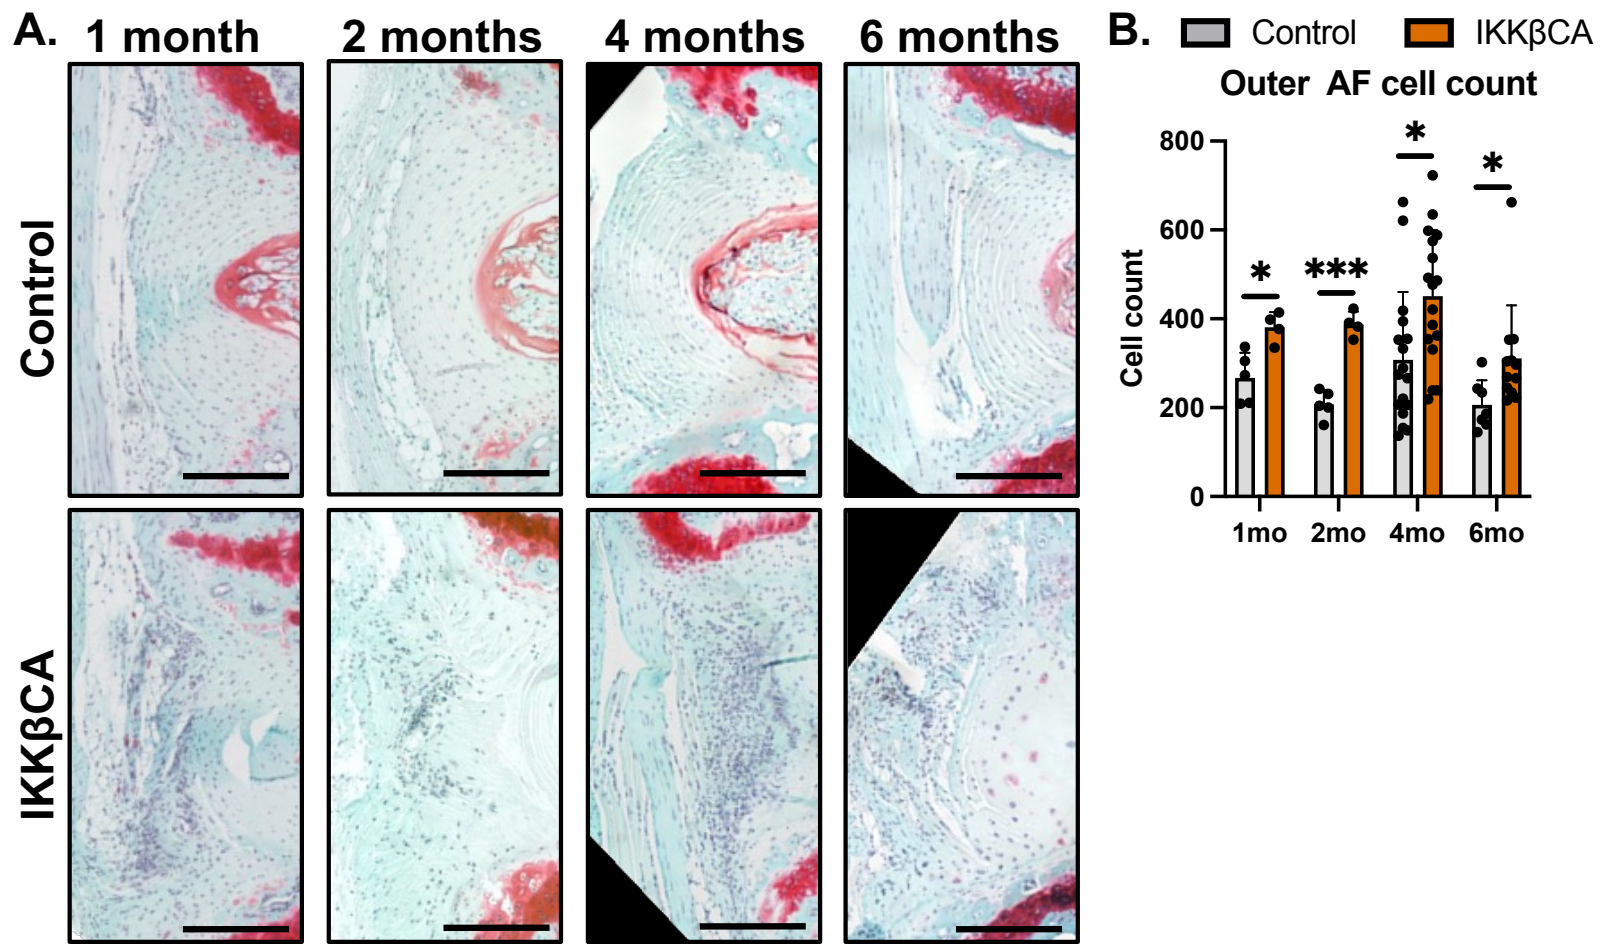

**Figure S2: IKK $\beta$  over-expression increases cellularity presence within the AF.** (A) Representative images of safranin-O stained mid sagittal sections of control and IKK $\beta$ CA caudal IVDs 1-, 2-, 4-, and 6-months post recombination. Scale bar = 250 $\mu$ m. (B) Quantification of outer AF cellularity using haematoxylin nuclear stain.

**M0****M1****M2****Control-CM**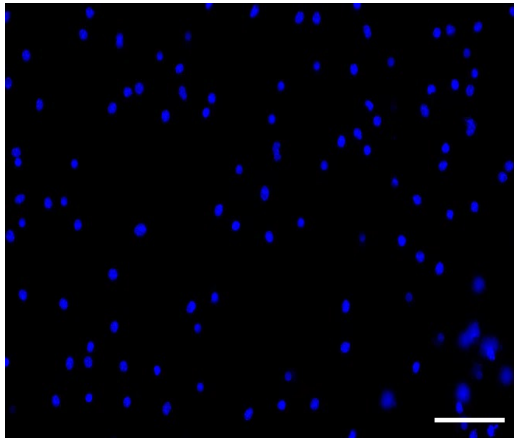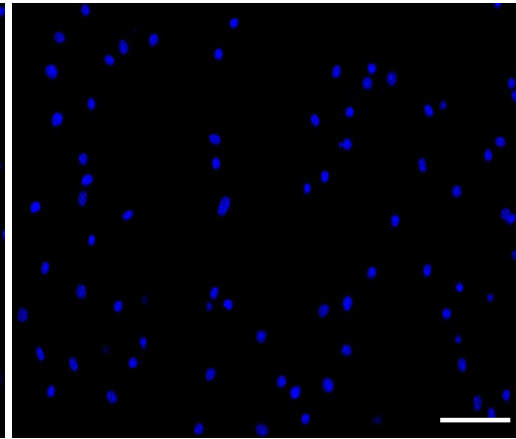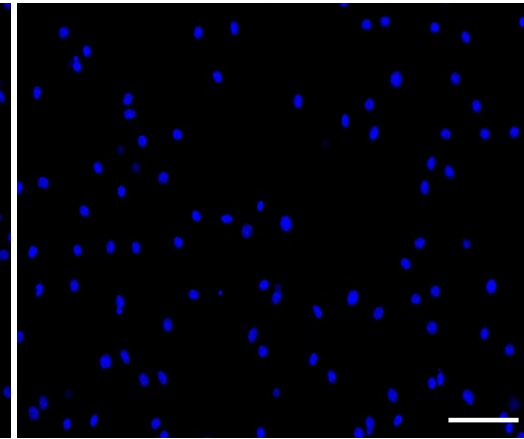**IKKβCA-CM**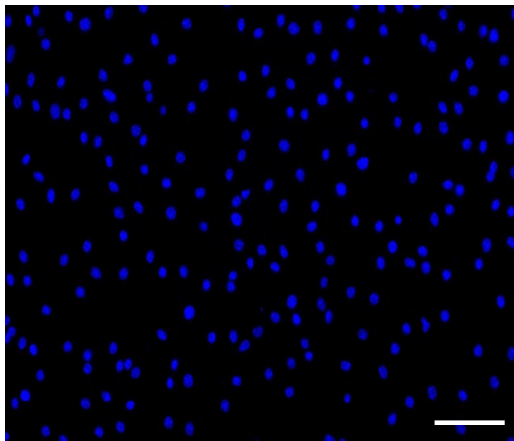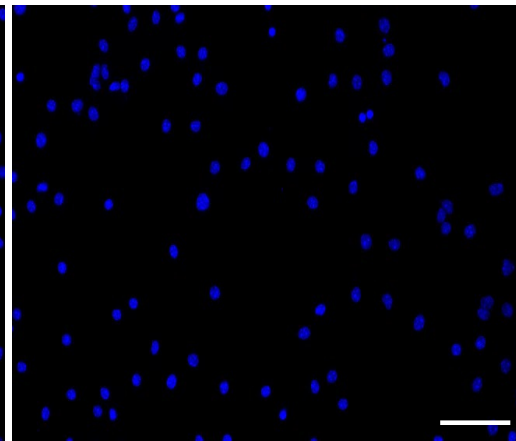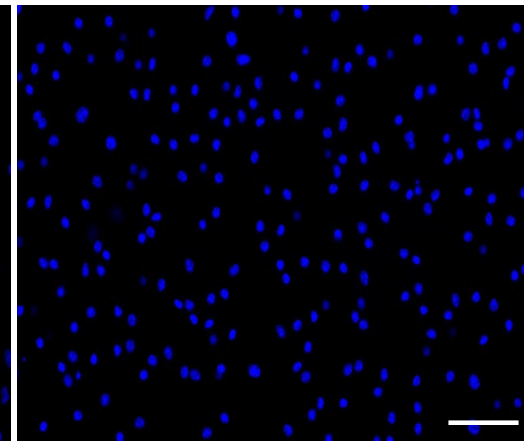

**Figure S3: IKKβ-CM increases macrophage migration *in vitro*.** Representative images of DAPI (nuclear) stained M0, M1, and M2 macrophages on transwell membranes following CM stimulation. Cell counting used for quantification of migration through transwell membranes. Scale bar = 100μm.

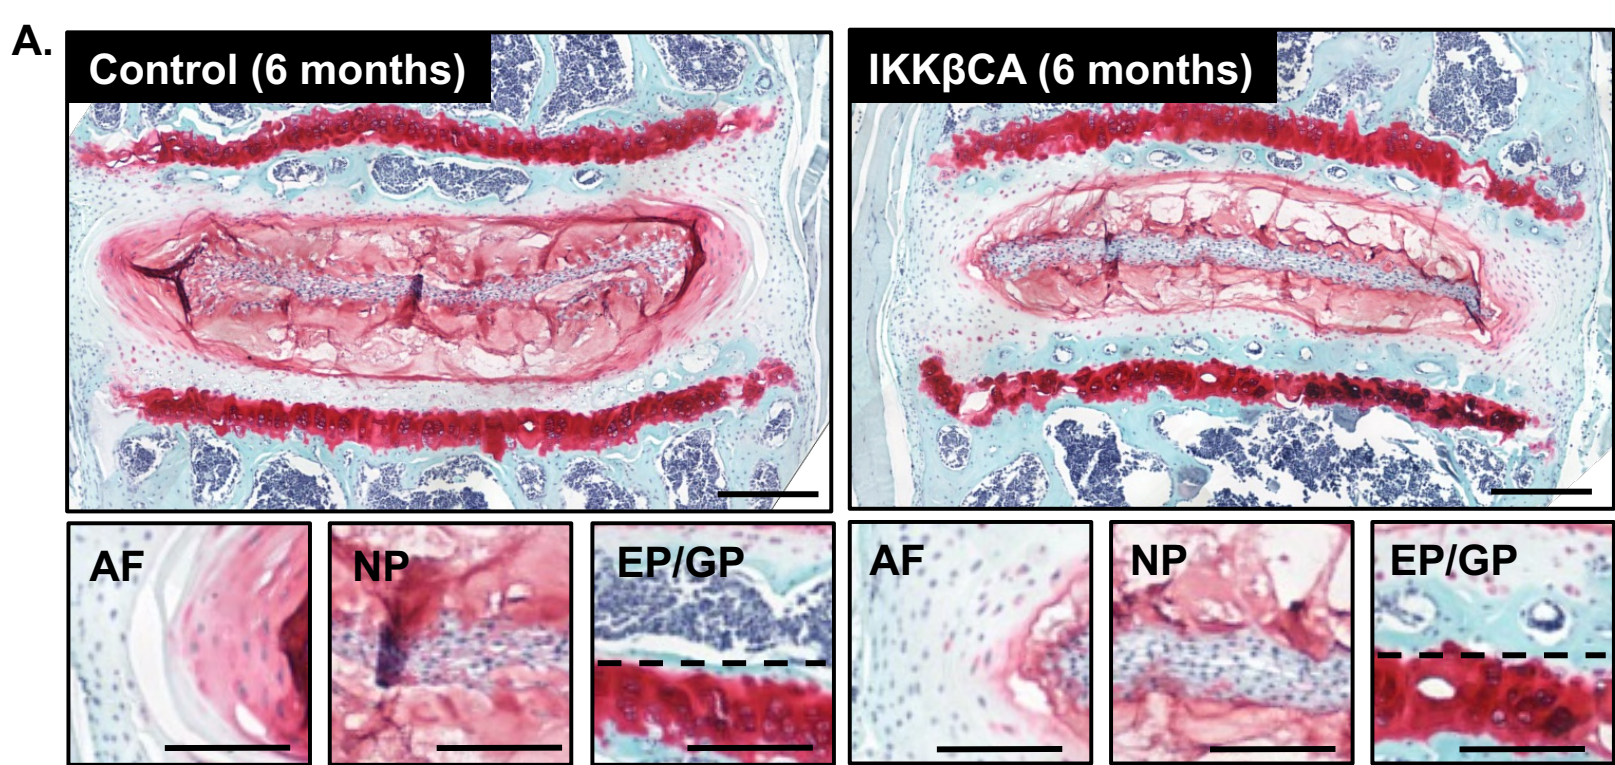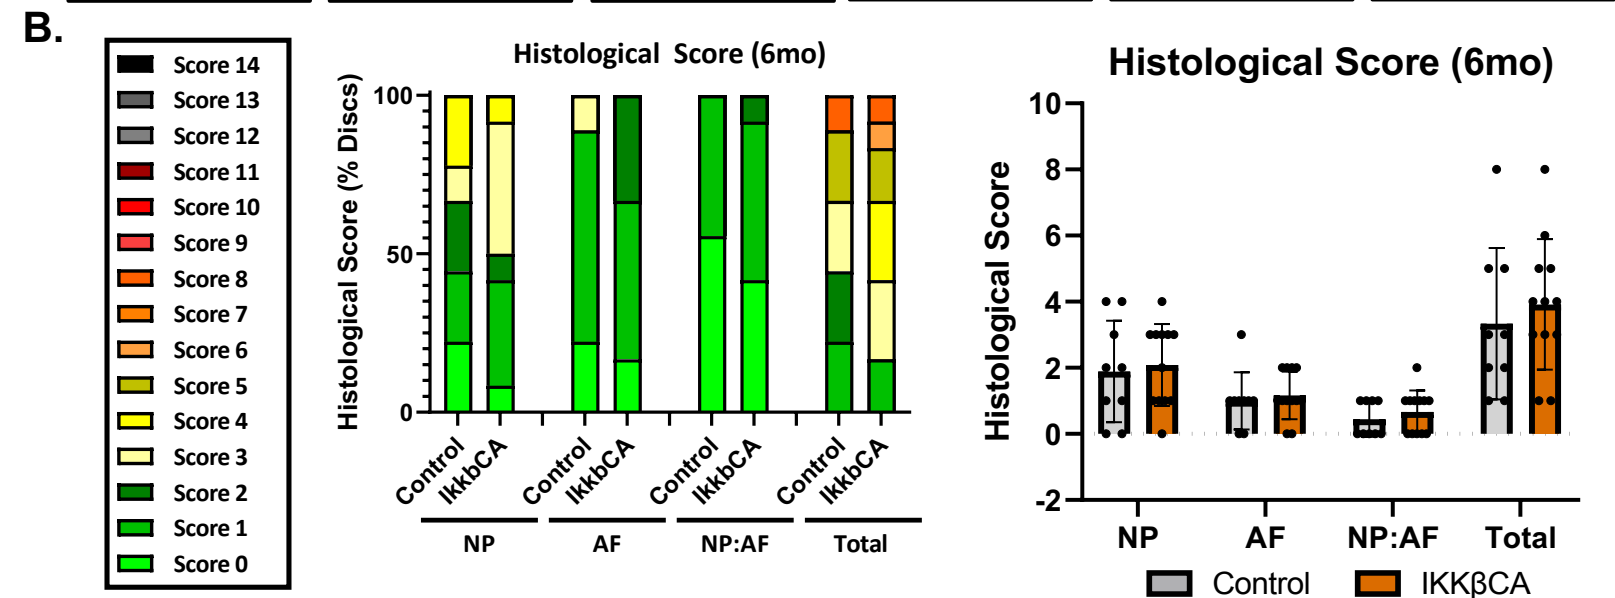

**Figure S4: IKK $\beta$  over-expression produces no significant changes to lumbar disc health/structure at 6-months.** (A) Representative images of safranin-O stained mid coronal sections of control and IKK $\beta$ CA lumbar IVDs 6-months post recombination. Total IVD scale bar = 400 $\mu$ m. Compartment image scale bar = 200 $\mu$ m. (B) Distribution of histological grades within NP, AF, and NP:AF border compartments, and Total score. Histological scoring severity legend ranging from 0 (healthy) to 14 (most severe). No significant differences observed.

**Table S1: FWD and REV murine primers (IDT) for rt-qPCR.**

| Gene Target, murine                                                                           | Forward Primer                  | Reverse Primer                  |
|-----------------------------------------------------------------------------------------------|---------------------------------|---------------------------------|
| Glyceraldehyde-3-phosphate dehydrogenase ( <i>Gapdh</i> )                                     | AAC AGC AAC TCC CAC TCT TC      | CCT GTT GCT GTA GCC GTA TT      |
| inhibitor of nuclear factor kappa B kinase subunit beta ( <i>Ikk2</i> )                       | CTG AAG ATC GCC TGT AGA AA      | TCC ATC TGT AAC CAG CTC CAG     |
| interleukin-6 ( <i>Il6</i> )                                                                  | CTT CCA TCC AGT TGC CTT CT      | CTC CGA CTT GTG AAG TGG TAT AG  |
| tumor necrosis factor alpha ( <i>Tnfa</i> )                                                   | TTG CTC TGT GAA GGG AAT GG      | GGC TCT GAG GAG TAG ACA ATA AAG |
| interleukin-1 beta ( <i>Il1b</i> )                                                            | ATG GGC AAC CAC TTA CCT ATT T   | GTT CTA GAG AGT GCT GCC TAA TG  |
| nitric oxide synthase 2 ( <i>Nos2</i> )                                                       | TCT CCC TTT CCT CCC TTC TT      | CTT CAG TCA GGA GGT TGA GTT T   |
| interferon gamma ( <i>Ifng</i> )                                                              | GGC CAT CAG CAA CAA CAT AAG     | GTT GAC CTC AAA CTT GGC AAT AC  |
| Prostaglandin-Endoperoxide Synthase 2 ( <i>Ptgs2/Cox2</i> )                                   | GAA GAT TCC CTC CGG TGT TT      | CCC TTC TCA CTG GCT TAT GTA G   |
| Cluster of differentiation 38 ( <i>CD38</i> )                                                 | TCT CTC TCT CTC TCT CTC TCT CT  | TCA GCT GTG CTG AGG ATT TAG     |
| Cluster of differentiation 206 ( <i>CD206</i> )                                               | GGA ATC AAG GGC ACA GAG TTA     | TTC CAT CTG CTC CAC AAT CC      |
| monocyte chemoattractant protein-1 ( <i>Mcp1</i> )                                            | CTC GGA CTG TGA TGC CTT AAT     | TGG ATC CAC ACC TTG CAT TTA     |
| macrophage inhibitory factor ( <i>Mif</i> )                                                   | GTT CCA CCT TCG CTT GAG T       | CAT CGC TAC CGG TGG ATA AA      |
| Matrix Metalloproteinase 3 ( <i>Mmp3</i> )                                                    | GGA CCA GGG ATT AAT GGA GAT G   | TGA GCA GCA ACC AGG AAT AG      |
| Matrix Metalloproteinase 9 ( <i>Mmp9</i> )                                                    | CTG GAA CTC ACA CGA CAT CTT     | TCC ACC TTG TTC ACC TCA TTT     |
| A Disintegrin-Like And Metalloprotease With Thrombospondin Type 1, Motif 4 ( <i>Adamts4</i> ) | GGC AGA GAA GGG ATG ATG TAA TAG | CCC AAC ATC ACC CAG GTA ATA A   |
| A Disintegrin-Like And Metalloprotease With Thrombospondin Type 1, Motif 5 ( <i>Adamts5</i> ) | GTG CTG TGT TTG CCA TCT TC      | GCA CTG CCT TGT TCT GTT TC      |
| nerve growth factor ( <i>Ngf</i> )                                                            | CAG TGA GGT GCA TAG CGT AAT     | CTC CTT CTG GGA CAT TGC TAT C   |
| brain derived neurotrophic factor ( <i>Bdnf</i> )                                             | CAA GAG TCC CGT CTG TAC TTT AC  | GAC TAG GGA AAT GGG CTT AAC A   |



**Table S2: Primary and secondary fluorescent antibodies used for immunohistochemistry.**

| Antigen                          | Company       | Cat #      | Dilution |
|----------------------------------|---------------|------------|----------|
| [1°] mCherry                     | Sicgen        | AB0040-200 | 1:250    |
| [1°] Phosphorylated p-65         | Abcam         | AB86299    | 1:500    |
| [1°] F4/80                       | Bio-rad       | MCA497GA   | 1:100    |
| [1°] IKK $\beta$                 | Sigma         | 07-1479    | 1:500    |
| [1°] CD38                        | Fisher        | PIMA516871 | 1:100    |
| [1°] CD206                       | Fisher        | PIPA595840 | 1:100    |
| [2°] Donkey anti-goat (AF 594)   | Thermo Fisher | A-11058    | 1:250    |
| [2°] Donkey anti-rabbit (AF 594) | Abcam         | AB150064   | 1:200    |
| [2°] Donkey anti-rat (AF 488)    | Abcam         | Ab150153   | 1:200    |
